# Supplementary material for: A cyclic trinuclear silver complex for photosynthesis of hydrogen peroxide
Source: Royal Society of Chemistry journal article supplement (doi:10.1039/d4sc04098h), 2024-01-01
Supplement: d4sc04098h1.pdf [file d4sc04098h1.pdf]

Electronic Supplementary Material (ESI) for Chemical Science.

This journal is © The Royal Society of Chemistry 2021

Electronic Supplementary Information (ESI) for

**A Cyclic Trinuclear Silver Complex for Photosynthesis of  
Hydrogen Peroxide**

Ri-Qin Xia,<sup>a</sup> Zhen-Na Liu,<sup>a</sup> Yu-Ying Tang,<sup>a</sup> Xiao Luo,<sup>a</sup> Rong-Jia Wei,<sup>a</sup> Tao Wu,<sup>a</sup> Guo-Hong Ning<sup>\*a</sup> and Dan Li<sup>\*a</sup>

<sup>a</sup>College of Chemistry and Materials Science, and Guangdong Provincial Key Laboratory of Functional Supramolecular Coordination Materials and Applications, Jinan University, Guangzhou 510632, People's Republic of China

E-mail addresses:

guohongning@jnu.edu.cn (G.-H. Ning)

danli@jnu.edu.cn (D. Li)

## Contents

|                                                           |    |
|-----------------------------------------------------------|----|
| Section S1. Materials and Methods .....                   | 3  |
| 1.1 Materials.....                                        | 3  |
| 1.2 Characterizations and instruments. ....               | 3  |
| 1.2.1 Photoelectrochemical measurement .....              | 3  |
| 1.2.2 Photocatalytic reaction. ....                       | 4  |
| 1.2.3 H <sub>2</sub> O <sub>2</sub> detection method..... | 4  |
| 1.2.4 Rotating disk electrode (RDE) measurements. ....    | 4  |
| 1.2.5 The AQY measurement. ....                           | 5  |
| Section S2. Synthesis and Characterizations .....         | 6  |
| 2.1 NMR spectroscopy.....                                 | 7  |
| 2.2 Fourier transform infrared spectrum .....             | 8  |
| 2.3 X-ray photoelectron spectroscopy.....                 | 9  |
| 2.4 Energy dispersive X-ray spectroscopy (EDS).....       | 10 |
| 2.5 Thermogravimetric analysis (TGA).....                 | 11 |
| 2.6 Power X-ray diffraction (PXRD) .....                  | 12 |
| 2.7 Measurement of water contact angle.....               | 13 |
| 2.8 Crystals structure analysis.....                      | 14 |
| 2.9 UV-Vis spectra .....                                  | 16 |
| 2.10 Mott-Schottky plot .....                             | 17 |
| 2.11 Valence band spectrum measurement.....               | 19 |
| 2.12 Energy gap from theoretical calculation .....        | 19 |
| 2.13 Photoluminescence (PL) properties .....              | 20 |
| 2.14 Room-temperature photoluminescence lifetime .....    | 22 |
| 2.15 Photo-catalytical experiment.....                    | 25 |
| 2.17 Isotopic exchange experiments .....                  | 31 |
| 2.18 RDE measurement .....                                | 34 |
| 2.19 EPR experiment .....                                 | 35 |
| 2.20 Cyclic Voltammetry (CV) test.....                    | 37 |
| Section S3. Computational Details .....                   | 38 |
| 3.1 DFT .....                                             | 38 |
| 3.2 Adsorption Energy ( $\Delta E_{ad}$ ) .....           | 42 |
| 3.3 Reaction Gibbs Free Energy ( $\Delta G$ ) .....       | 45 |
| Reference .....                                           | 49 |

## Section S1. Materials and Methods

**1.1 Materials.** Starting materials, reagents, and solvents were purchased from commercial sources and used without further purification.

**1.2 Characterizations and instruments.** Powder X-ray diffraction (PXRD) data were collected at 40 kV, 30 mA using microcrystalline samples on a Rigaku Ultima IV diffractometer using Cu-K $\alpha$  radiation ( $\lambda = 1.5418 \text{ \AA}$ ). The measurement parameters include a scan speed of 0.5  $^{\circ}$ /min, a step size of 0.02 $^{\circ}$ , and a scan range of  $2\theta$  from 3 $^{\circ}$  to 40 $^{\circ}$ . Thermogravimetric analysis was performed on a Mettler-Toledo (TGA/DSC1) thermal analyzer. Measurement was made on approximately 5 mg of dried samples under an N<sub>2</sub> flow with a heating rate of 10  $^{\circ}$ C/min. Fourier transform infrared (FT-IR) spectrum was measured using a Nicolet Avatar 360 FT-IR spectrophotometer. X-ray photoelectron (XPS) spectroscopy spectra were performed by a Thermo ESCALAB 250XI system. Liquid <sup>1</sup>H and <sup>13</sup>C NMR spectra were recorded on Bruker Biospin Avance (400 MHz) equipment using tetramethylsilane (TMS) as an internal standard. UV-visible absorption spectra were recorded on Agilent Cary 4000. Energy dispersive X-ray spectroscopy (EDS) analyses were taken on the COXEM EM-30 PLUS System. Electron paramagnetic resonance (EPR) signals were recorded on a Bruker Magnetech ESR 5000 spectrometer (Germany) at room temperature under visible-light irradiation using a 300 W Xenon lamp (>420 nm). The electrochemical measurements were performed in a conventional three-electrode cell on a CHI-760E electrochemical workstation (Shanghai Chenhua Instrument Co., Ltd, China). The apparent quantum yield (AQY) was measured by multi-channel photoreaction system 4-HZJ (Beijing Perfect Light Technology Co., LTD., Beijing, China, PCX50C) and optical radiometer (Beijing Normal University Photoelectric Instrument Factory, PL-MW2000). In-situ Fourier transforms infrared spectrometry was carried out on the Thermo Nicolet iS50 instrument. The sample was filled into an in-situ IR cell, and O<sub>2</sub> and H<sub>2</sub>O vapors (The gas flow is 20 mL/min) were introduced into the cell and fiber source (The light intensity is 300 mW/cm<sup>2</sup>). The baseline was obtained before the sample reached O<sub>2</sub> adsorption equilibrium within 1 h. Photoluminescence Spectroscopy was performed on the F-7000 FL Spectrophotometer. GC-MS analysis was carried out on an Agilent 7890B GC analyzer. The headspace was sampled continuously (100  $\mu$ L sample volume) by online gas chromatography (Fuli, GC-9790II) equipped with a thermal conductivity detector (TCD) referencing against standard gas with a known concentration of O<sub>2</sub>.

**1.2.1 Photoelectrochemical measurement.** All electrochemical measurements (photocurrent, Mott Schottky, and EIS) were made in 0.5 M sodium sulfate solution (pH=6.8) through the traditional three-electrode system in the CHI 760E electrochemical workstation. During the photocurrent measurement, an Ag/AgCl electrode was used as the reference electrode and a Pt foil electrode acted as the counter

electrode. The working electrodes were designed using resulting samples covered on the surface of fluoride tin oxide (FTO) conductor glass. A quartz cell filled with 0.5 M Na<sub>2</sub>SO<sub>4</sub> (pH=6.8) electrolyte was used as the measurement system. For electrochemical impedance spectroscopy (EIS) measurements, the amplitude of the sinusoidal wave was 5 mV, and the frequency ranged from 100 kHz to 0.05 Hz.

**1.2.2 Photocatalytic reaction.** In a typical experiment, the photosynthesis of H<sub>2</sub>O<sub>2</sub> was performed in a 10 mL quartz reaction tube containing 4 mg photocatalyst, and 5 mL deionized water was sonicated in the dark for 30 minutes and oxygen bubbles for 15 minutes. Then, the system was irradiated with a xenon lamp source (CEL-HXF300), the light intensity is 0.2739 W/cm<sup>2</sup>. The H<sub>2</sub>O<sub>2</sub> content in the solution was detected after the catalyst was filtered. The photocatalyst was not damaged after catalysis, as was confirmed by the Inductively coupled plasma mass spectrometry (ICP-MS) of the reaction supernatant.

**1.2.3 H<sub>2</sub>O<sub>2</sub> detection method.** The amount of H<sub>2</sub>O<sub>2</sub> was analyzed by iodometry.<sup>1</sup> Taken 1 mL of filtered filtrate and dilute to 10 mL, removed 2 mL then added 1 mL of 0.4 mol·L<sup>-1</sup> potassium iodide (KI) aqueous solution and 1 mL of 0.1 mol·L<sup>-1</sup> potassium hydrogen phthalate (C<sub>8</sub>H<sub>5</sub>KO<sub>4</sub>) aqueous solution to obtained mixture solution, which was then kept for 12 h. A redox reaction occurs between H<sub>2</sub>O<sub>2</sub> molecules and iodine ions (I<sup>-</sup>) under acidic conditions to generate triiodide ions (I<sub>3</sub><sup>-</sup>), which have strong absorption at about 350 nm. The absorbance of I<sub>3</sub><sup>-</sup> at 350 nm is measured by UV-visible absorption spectra (Agilent Cary 4000), and then the amount of H<sub>2</sub>O<sub>2</sub> generated by each reaction can be calculated by comparison with the standard curve of H<sub>2</sub>O<sub>2</sub>.

**1.2.4 Rotating disk electrode (RDE) measurements.** A glassy carbon rotating disk electrode (Hardware User's Manual Model 636 Electrode Rotator) served as the substrate for working electrode. The working electrode was prepared as followed: 1 (4 mg) was dispersed in EtOH (2 mL) containing Nafion (50 μL) by ultrasonication. The slurry (20 μL) was put onto the disk electrode and dried at room temperature. The linear sweep voltammograms (LSV) were obtained in an O<sub>2</sub>-saturated 0.1 M phosphate buffer solution (pH = 7) at room temperature with a scan rate 10 mV s<sup>-1</sup> and different rotation speeds after O<sub>2</sub> bubbling for 1 hour. During the reaction, light source from the Xe-lamp vertically illuminated at the rotating electrode, where the photoelectrochemical kinetic information and the formation of peroxide could be obtained. The average number of electrons (n) was calculated by Koutecky-Levich equation:

$$\frac{1}{J} = \frac{1}{J_L} + \frac{1}{J_K} = \frac{1}{B\omega^{1/2}} + \frac{1}{J_K}$$

$$B = 0.62nFC_0D_0^{2/3}\nu^{1/6}$$

where  $J$  is the measured current density,  $J_K$  and  $J_L$  are the kinetic and diffusion-limiting current densities,  $\omega$  is the angular velocity,  $n$  is transferred electron number,  $F$  is Faraday constant (96485 C mol<sup>-1</sup>),  $C_0$  is the bulk concentration of O<sub>2</sub> (1.26 × 10<sup>-6</sup> mol

$\text{cm}^{-3}$ ),  $D_0$  is the diffusion coefficient of  $\text{O}_2$  in 0.1 M phosphate buffer solution ( $2.7 \times 10^{-5} \text{ cm}^2 \text{ s}^{-1}$ ), and  $\nu$  is kinetic viscosity of the electrolyte ( $0.01 \text{ cm}^2 \text{ s}^{-1}$ ), respectively.

**1.2.5 The AQY measurement.** The photocatalytic reaction was performed in pure deionized water (5 mL) and photocatalyst (4 mg) in a 50 mL photocatalytic reactor. After sonication for 30 min and  $\text{O}_2$  bubbling for 15 min, the bottle was irradiated by a multi-channel photoreaction system 4-HZJ (Beijing Perfect Light Technology Co., LTD., Beijing, China, PCX50C). The apparent quantum yield (AQY) of the photocatalyst was measured with 420 nm, 450 nm, 485 nm, 520 nm, and 535 nm band-pass filters. The active area of the reactor is about  $6.33 \text{ cm}^2$ . Use an optical radiometer to take the average value of monochromatic light intensity at three representative points. Therefore, the light intensity at 420 nm, 450 nm, 485 nm, 520 nm, and 535 nm is calculated as  $0.1316 \text{ W cm}^{-2}$ ,  $0.1342 \text{ W cm}^{-2}$ ,  $0.0790 \text{ W cm}^{-2}$ ,  $0.0382 \text{ W cm}^{-2}$ ,  $0.0240 \text{ W cm}^{-2}$ , respectively. AQY is calculated as follows<sup>2</sup>:

$$\text{AQY}\% = \frac{n_{\text{H}_2\text{O}_2} \times 2 \times N_A}{\Delta P \times S \times t \times \frac{\lambda}{hc}} \times 100\%$$

$n$  = number of produced  $\text{H}_2\text{O}_2$  molecules (mol)

$N_A$  (Avogadro constant) =  $6.02 \times 10^{23} \text{ mol}^{-1}$

$\Delta P$  = the intensity difference of irradiation light ( $\text{W} / \text{cm}^2$ ) =  $0.1342 \text{ W} / \text{cm}^2$  (450 nm)

$S$  = Irradiation area ( $\text{cm}^2$ ) =  $6.33 \text{ cm}^2$

$t$  = the photoreaction time (s) = 3600 s

$\lambda$  = the wavelength of the monochromatic light (m) =  $450 \times 10^{-9} \text{ m}$

$h$  (Planck constant) =  $6.626 \times 10^{-34} \text{ J}\cdot\text{s}$

$c$  (Speed of light) =  $3 \times 10^8 \text{ m}\cdot\text{s}^{-1}$

## Section S2. Synthesis and Characterizations

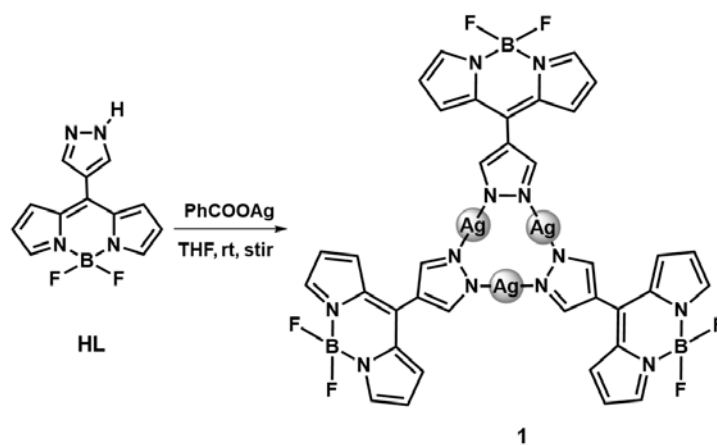

**Scheme S1** The synthesis of Ag-CTC **1**

**Synthesis of 1:** **HL** was synthesized by referring to the reported method<sup>3</sup>. Anhydrous tetrahydrofuran (THF) solution of ligand **HL** (25.8 mg, 0.1 mmol) and PhCOOAg (23 mg, 0.1 mmol) was stirred at room temperature for 24 hours under dark to give the Ag-CTC **1** as orange powder (16.4 mg, Yield: 45% based on **HL**). <sup>1</sup>H NMR (400 MHz, DMSO-*d*<sub>6</sub>, 298 K): δ (ppm) 8.35 (s, 1H), 7.99 (s, 1H), 7.43 (s, 1H), 6.69 (s, 1H). <sup>19</sup>F NMR (400 MHz, DMSO-*d*<sub>6</sub>, 298 K): δ (ppm) 141.66 – 141.89 (m). <sup>13</sup>C NMR (400 MHz, DMSO-*d*<sub>6</sub>, 298 K): δ (ppm) 144.57, 141.92, 141.15, 133.17, 129.98, 118.42, 114.26, 67.49, 49.07, 25.59. Elemental analysis (CHN), C<sub>36</sub>H<sub>24</sub>Ag<sub>3</sub>B<sub>3</sub>F<sub>6</sub>N<sub>12</sub>(H<sub>2</sub>O)<sub>3</sub>(CH<sub>3</sub>OH), calculated (%): C 37.64, H 2.90, N 14.23; found (%): C 37.72, H 2.75, N 13.81.

The crystals of **1** that are suitable for single crystals X-ray diffraction were obtained by solvothermal synthesis. Specifically, **HL** (5.0 mg, 0.02 mmol) and AgNO<sub>3</sub> (3.6 mg, 0.02 mmol) were mixed in anhydrous EtOH (2 mL) at 80 °C for three days to give **1** as orange crystals, (1.0 mg, Yield: 13.7% based on **HL**).

## 2.1 NMR spectroscopy.

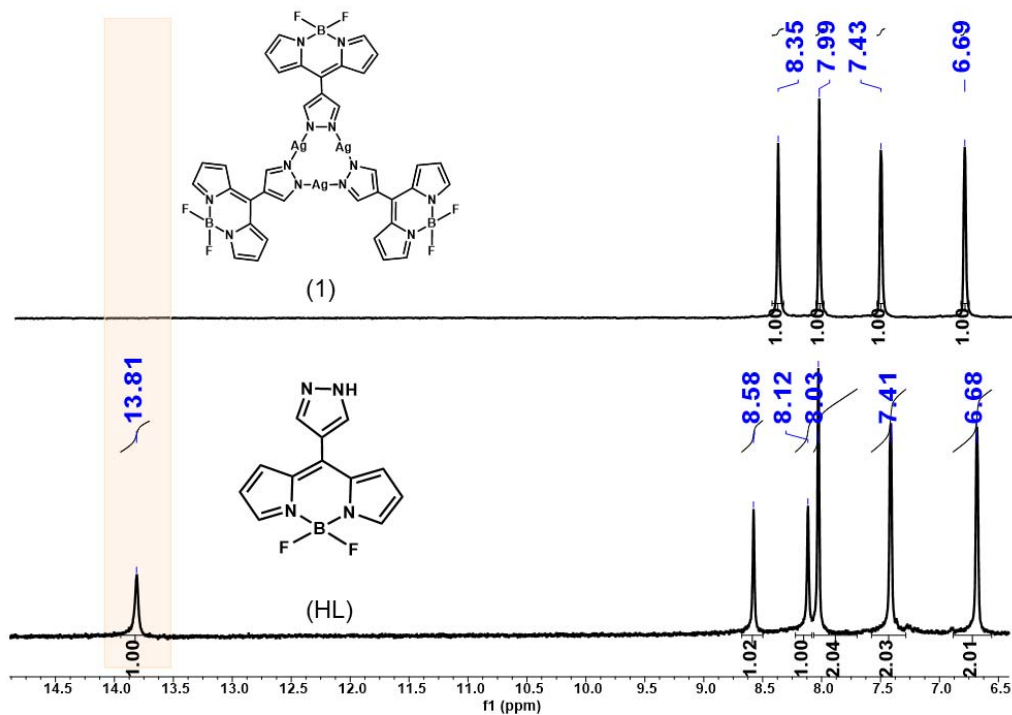

Fig. S1  $^1\text{H}$  NMR spectra (400 MHz,  $\text{DMSO-}d_6$ , 298 K) of **HL** (bottom) and **1** (top).

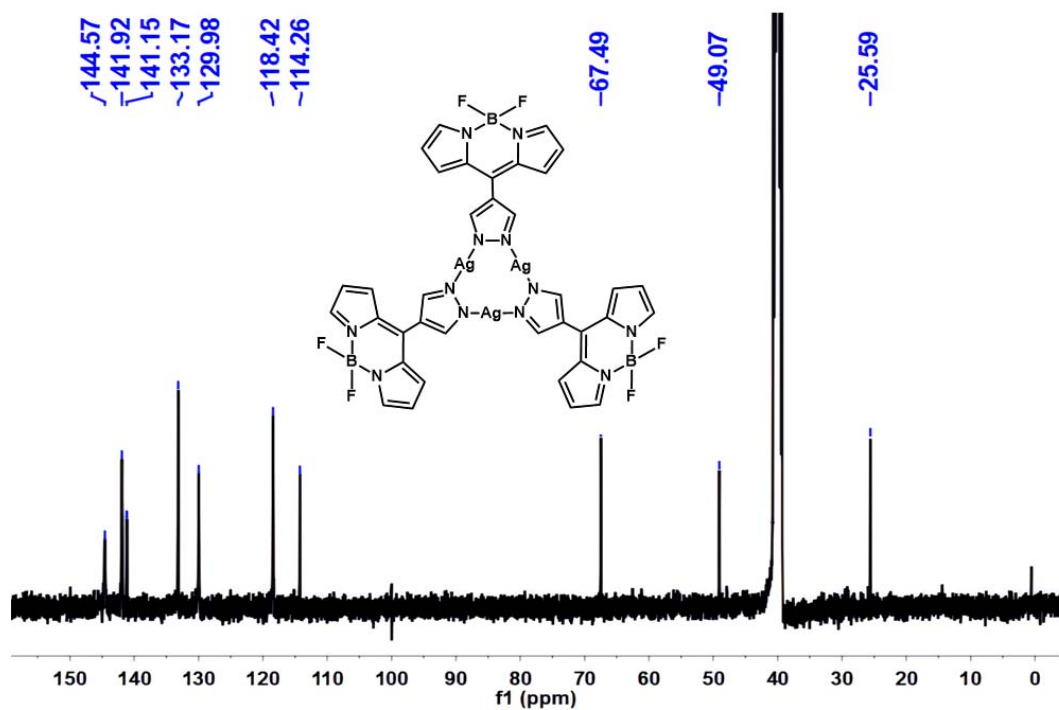

Fig. S2  $^{13}\text{C}$  NMR spectrum (400 MHz,  $\text{DMSO-}d_6$ , 298 K) of **1**.

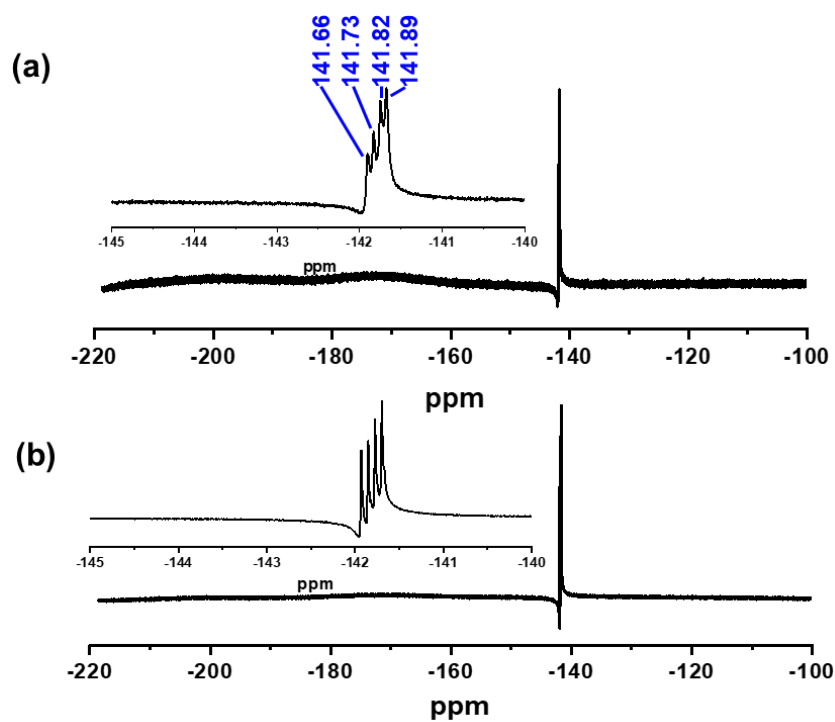

**Fig. S3**  $^{19}\text{F}$  NMR spectra (400 MHz,  $\text{DMSO-}d_6$ , 298 K) of (a) **1** and (b) **HL**.

## 2.2 Fourier transform infrared spectrum

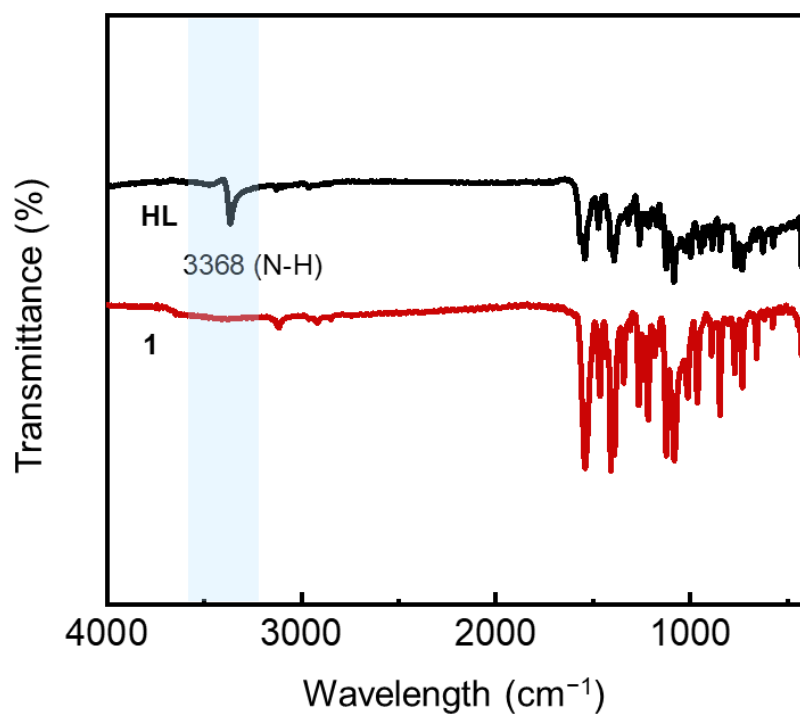

**Fig. S4** FT-IR spectra of **HL** (black line) and **1** (red line).



### 2.3 X-ray photoelectron spectroscopy

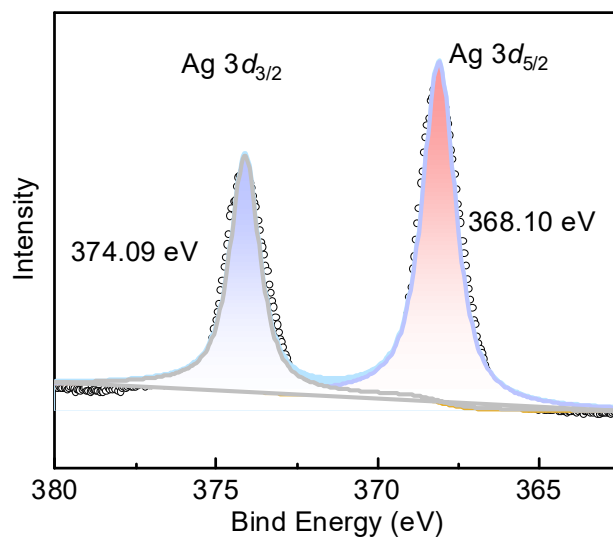

**Fig. S5** XPS of **1** suggesting all Ag ions are +1.

## 2.4 Energy dispersive X-ray spectroscopy (EDS)

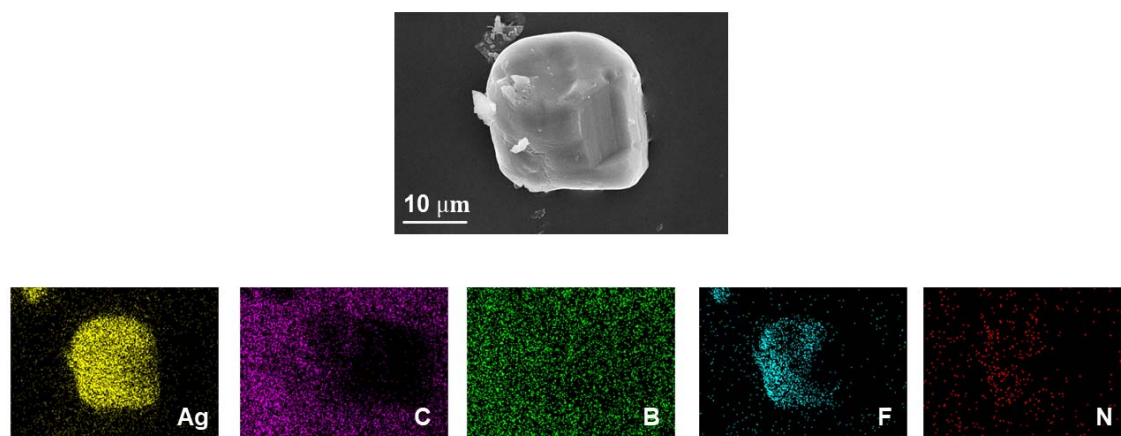

**Fig. S6** EDS of **1** showing the uniform distribution of elements Ag, C, B, F and N.

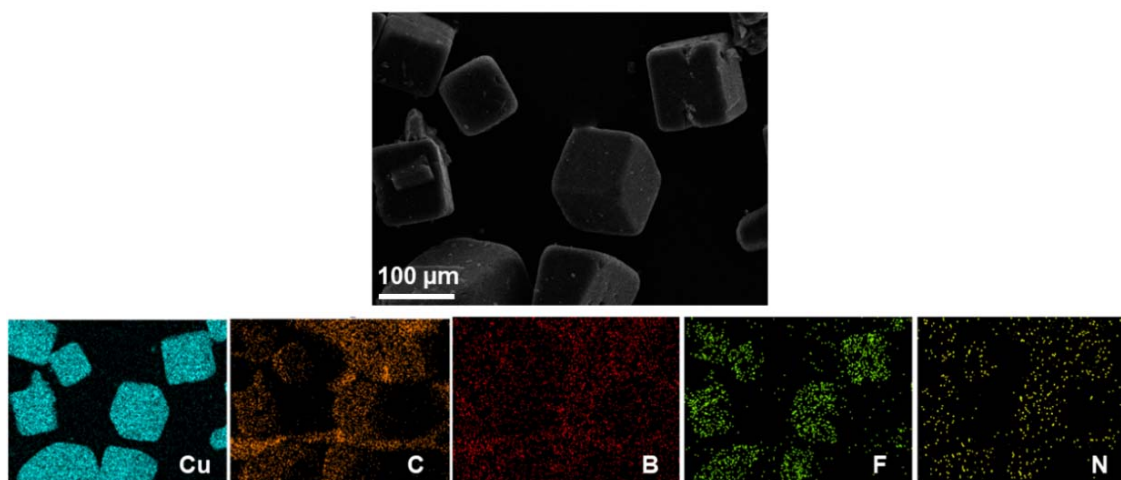

**Fig. S7** EDS of **2** showing the uniform distribution of elements Cu, C, B, F and N.

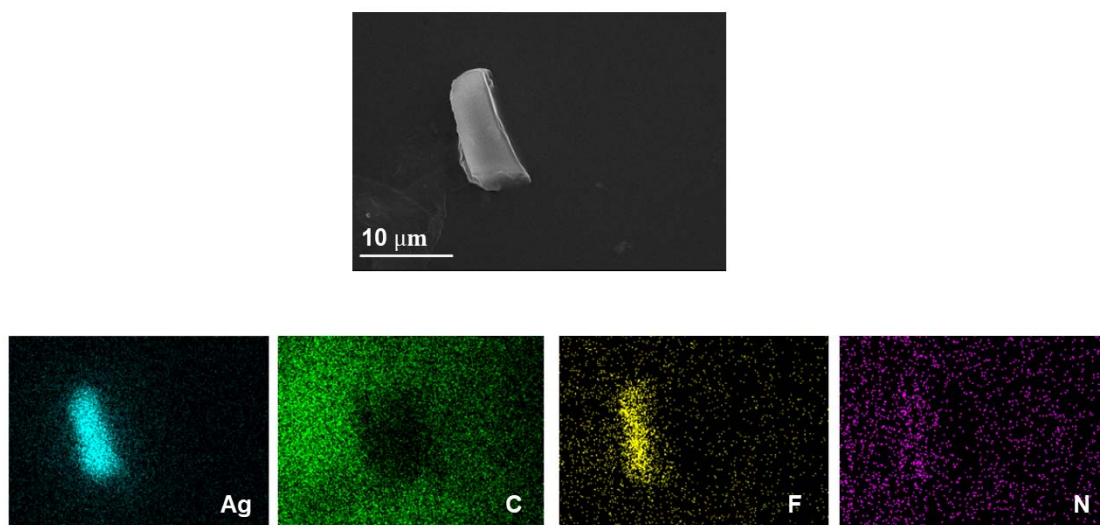

**Fig. S8** EDS of **3** showing the uniform distribution of elements Ag, C, F and N.

### 2.5 Thermogravimetric analysis (TGA)

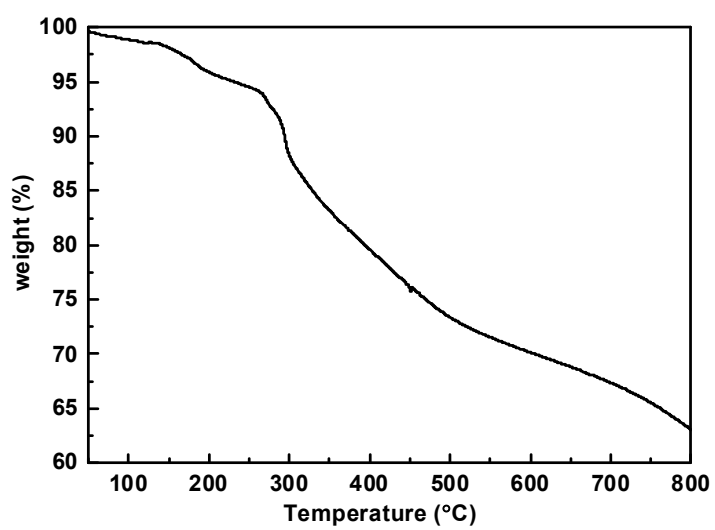

**Fig. S9** TGA profile of **1** under N<sub>2</sub> atmosphere.

## 2.6 Power X-ray diffraction (PXRD)

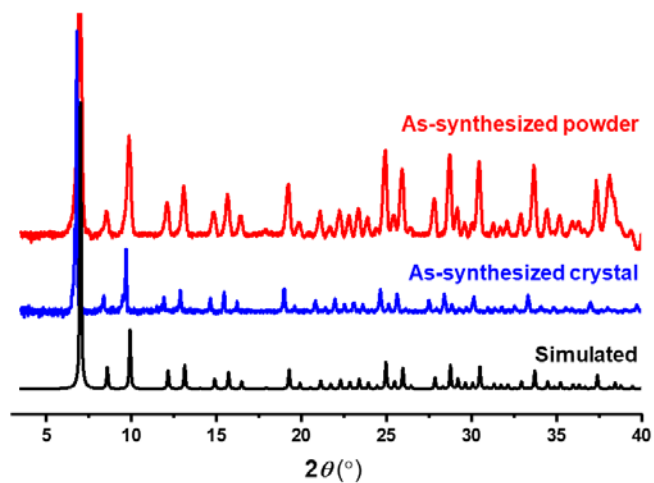

**Fig. S10** The comparison of PXRD patterns of simulated (black line), as-synthesized crystals (blue line) and powder (red line) samples of **1**.

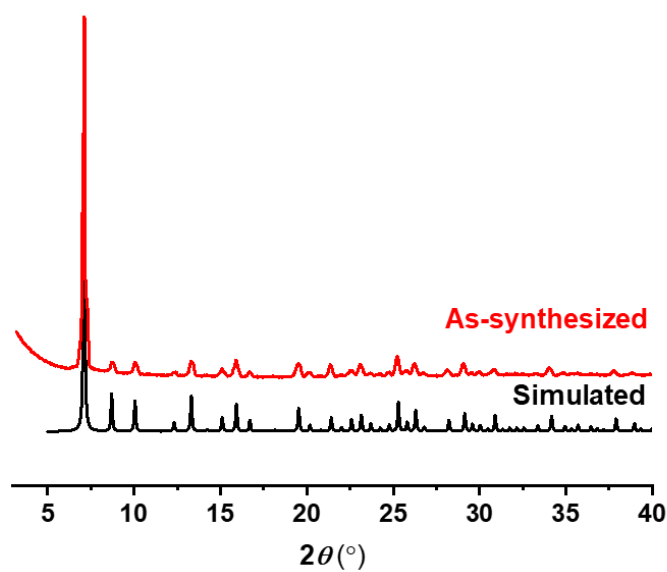

**Fig. S11** The comparison of PXRD patterns of simulated and as-synthesized crystal samples of **2**.

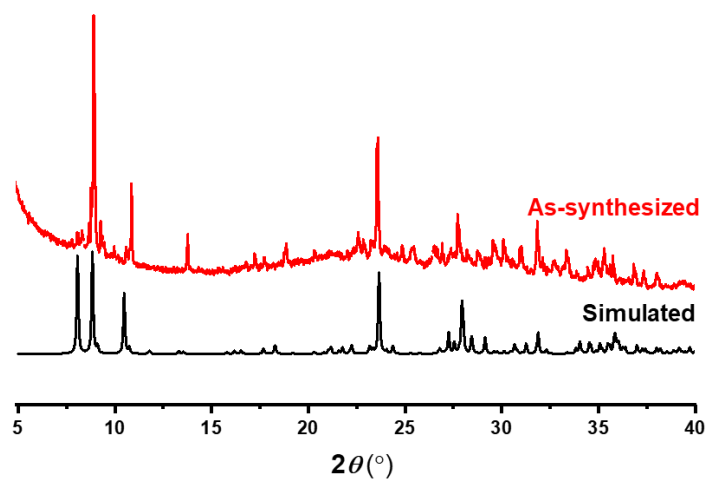

**Fig. S12.** The comparison of PXRD patterns of simulated and as-synthesized crystal samples of **3**.

### 2.7 Measurement of water contact angle

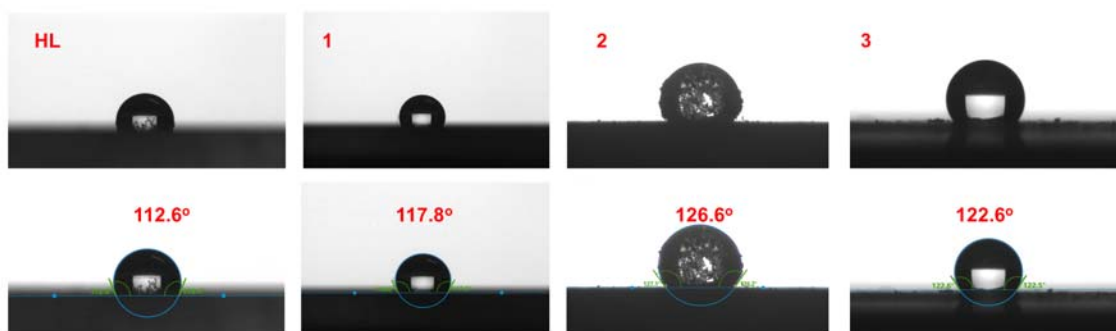

**Fig. S13** Water contact angle of **HL**, **1**, **2** and **3**.

## 2.8 Crystals structure analysis

Suitable single crystal of **1** was mounted with nylon loops. Data was collected on an Oxford Diffraction XtalAB [Rigaku(Cu) Xray dual wavelength source,  $K\alpha$ ,  $\lambda = 1.5418 \text{ \AA}$ ] equipped with a monochromator and CCD plate detector (CrysAlisPro CCD, Oxford Diffraction Ltd) at 100 K. Single-crystal structures of compound **1** were solved by direct methods by ShelXS<sup>4</sup> in Olex2 1.5<sup>5</sup>. All non-hydrogen atoms were refined with anisotropic thermal parameters, and all hydrogen atoms were included in calculated positions and refined with isotropic thermal parameters riding on those of the parent atoms. Crystal data and structure refinement parameters were summarized in Table S1.

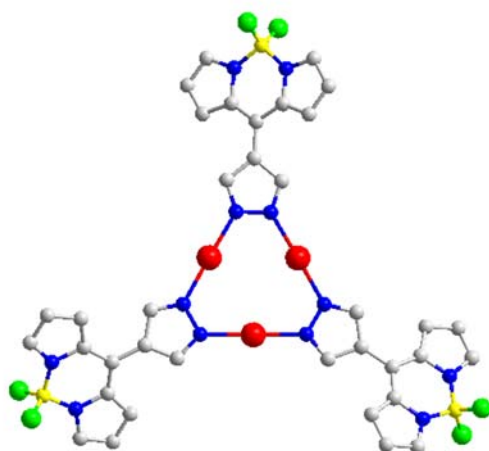

**Fig. S14** Structure diagram of **1**. Color codes: N, blue; Ag, red; B, light yellow; and F, light green. H atoms are omitted for clarity.

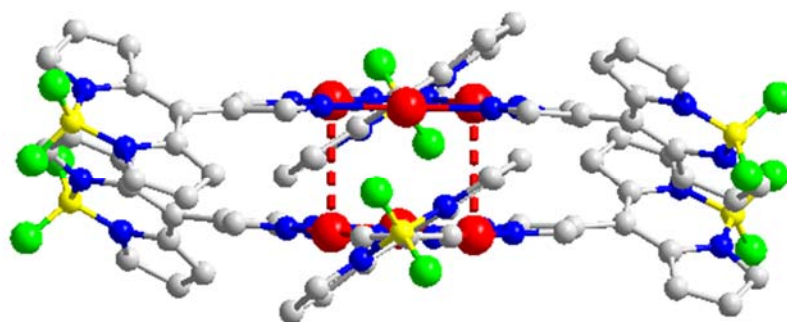

**Fig. S15** Stacked diagram showing a dimer of compound **1**, and the distance between  $\text{Ag}\cdots\text{Ag}$  is 3.75 Å. Color codes: N, blue; Ag, red; B, light yellow; and F, light green. H atoms are omitted for clarity.

**Table S1** Crystal system, space group, and unit cell parameters of **1**.

| Parameter                                                       | 1                                                                              |
|-----------------------------------------------------------------|--------------------------------------------------------------------------------|
| Empirical formula                                               | C <sub>12</sub> H <sub>8</sub> AgBF <sub>2</sub> N <sub>4</sub>                |
| Formula weight                                                  | 364.90                                                                         |
| Temperature (K)                                                 | 100.00(11)                                                                     |
| Wavelength (Å)                                                  | 1.54178                                                                        |
| Crystal system                                                  | cubic                                                                          |
| Space group                                                     | <i>Ia</i> -3                                                                   |
| <i>a</i> (Å)                                                    | 25.1961(3)                                                                     |
| <i>b</i> (Å)                                                    | 25.1961(3)                                                                     |
| <i>c</i> (Å)                                                    | 25.1961(3)                                                                     |
| $\alpha$ (°)                                                    | 90                                                                             |
| $\beta$ (°)                                                     | 90                                                                             |
| $\gamma$ (°)                                                    | 90                                                                             |
| Volume (Å <sup>3</sup> )                                        | 15995.6(6)                                                                     |
| <i>Z</i>                                                        | 48                                                                             |
| $\rho_{calc}$ g / cm <sup>3</sup>                               | 1.818                                                                          |
| $\mu$ / mm <sup>-1</sup>                                        | 12.307                                                                         |
| F(000)                                                          | 8544.0                                                                         |
| 2 $\theta$ range for data collection (°)                        | 4.2740 to 77.0860                                                              |
| Index ranges                                                    | -31 ≤ <i>h</i> ≤ 31<br>-31 ≤ <i>k</i> ≤ 29<br>-31 ≤ <i>l</i> ≤ 25              |
| Reflections collected                                           | 2849                                                                           |
| Independent reflections                                         | 2156 [ <i>R</i> <sub>int</sub> = 0.0865,<br><i>R</i> <sub>sigma</sub> = 0.140] |
| Completeness (%)                                                | 100                                                                            |
| Data / restraints / parameters                                  | 2849 / 0 / 181                                                                 |
| Largest diff. peak and hole (e/Å <sup>3</sup> )                 | 1.821, -0.575                                                                  |
| Goodness-of-fit on F <sup>2</sup>                               | 1.089                                                                          |
| <i>R</i> <sub>1</sub> <sup>a</sup> [ <i>I</i> ≥ 2σ( <i>I</i> )] | 0.0676                                                                         |
| <i>wR</i> <sub>2</sub> <sup>b</sup> (all data)                  | 0.2250                                                                         |
| DOI                                                             | 10.5517/ccdc.csd.cc2gqh2s                                                      |

<sup>a</sup> $R_1 = \Sigma|F_o| - |F_c| / \Sigma|F_o|$ . <sup>b</sup> $wR_2 = \{[\Sigma w(F_o^2 - F_c^2)^2] / \Sigma[w(F_o^2)^2]\}^{1/2}$ ;  $w = 1 / [\sigma^2(F_o^2) + (aP)^2 + bP]$ , where  $P = [\max(F_o^2, 0) + 2F_c^2] / 3$  for all data.

## 2.9 UV-Vis spectra

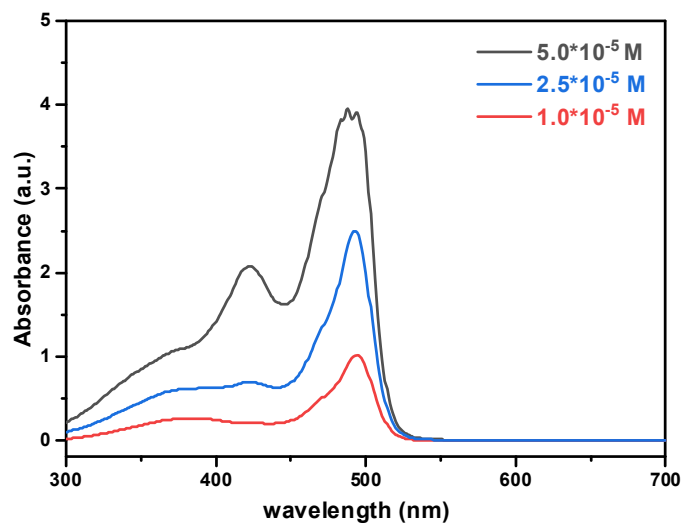

Fig. S16 UV-Vis spectra of **1** in DMSO.

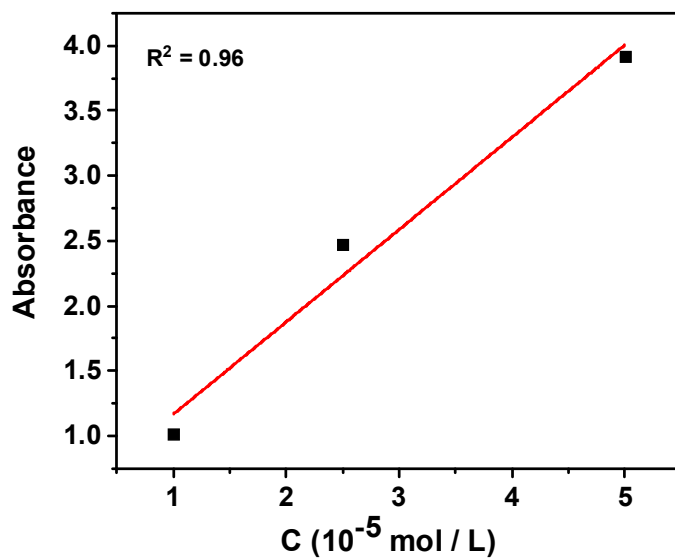

Fig. S17 Absorbance-concentration fitting curve of **1**. R<sup>2</sup> = 0.96.



## 2.10 Mott-Schottky plot

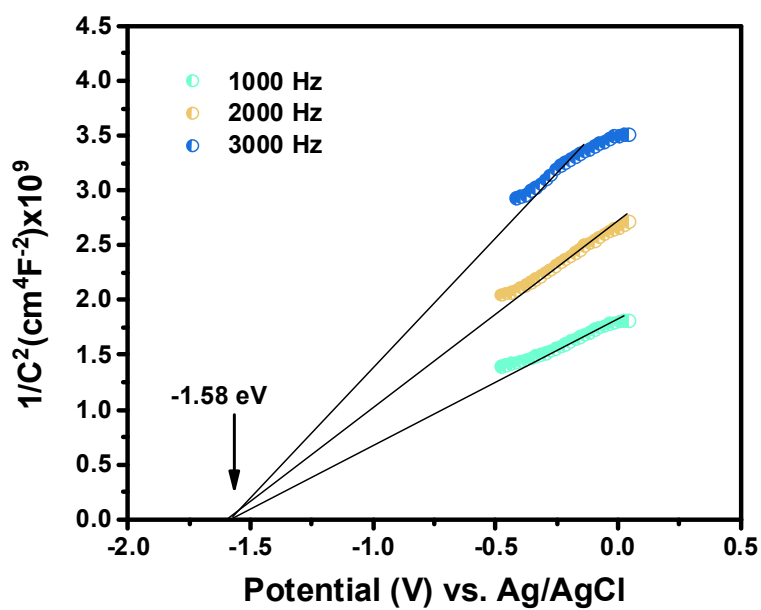

Fig. S18 Mott-Schottky plot of HL.

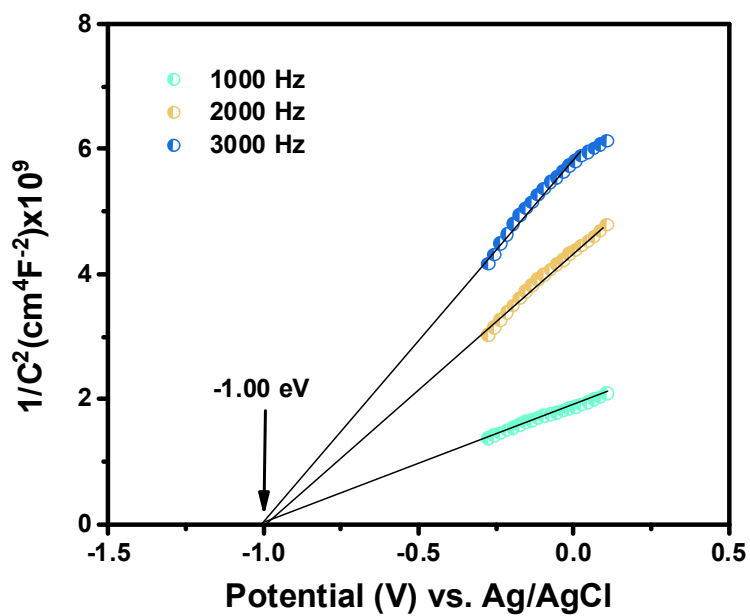

Fig. S19 Mott-Schottky plot of 1.

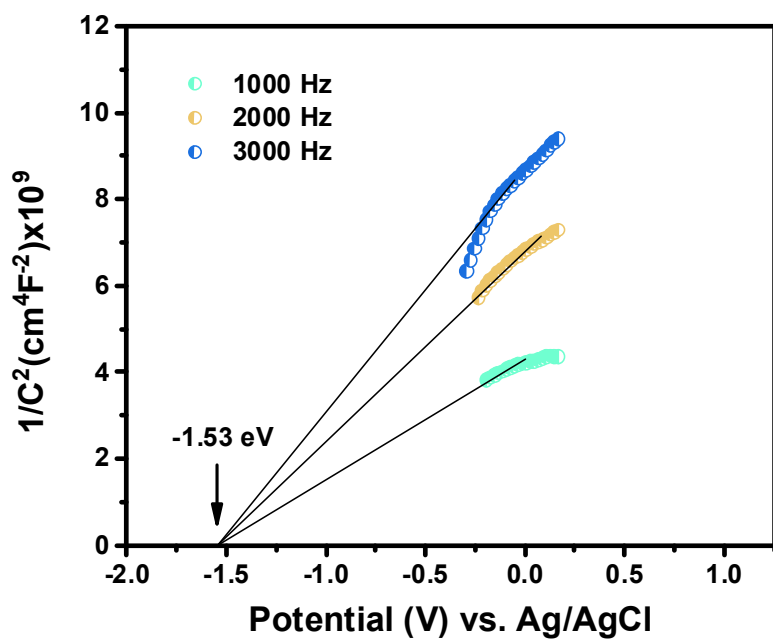

Fig. S20 Mott-Schottky plot of 2.

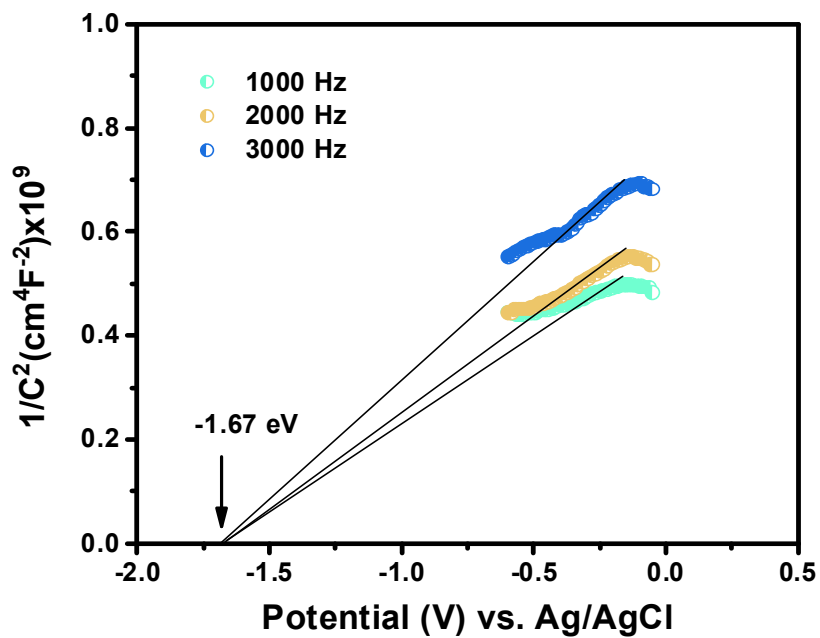

Fig. S21 Mott-Schottky plot of 3.

## 2.11 Valence band spectrum measurement

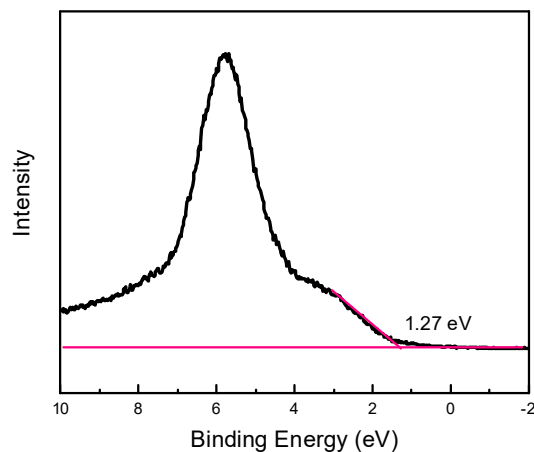

**Fig. S22** Valence band spectrum of **1**. The corresponding  $E_{VB}$  XPS of **1** is measured to be 1.27 eV. Then, the  $E_{VB}$  vs. standard hydrogen electrode ( $E_{VB, NHE}$ ) can be calculated according to the following formula<sup>6</sup>:  $E_{VB, NHE} = \phi + E_{VB, XPS} - 4.44$ . where  $\phi$  is the work function of the instrument (4.2 eV). Thus, the  $E_{VB, NHE}$  of **1** is calculated to be 1.03 eV.

## 2.12 Energy gap from theoretical calculation

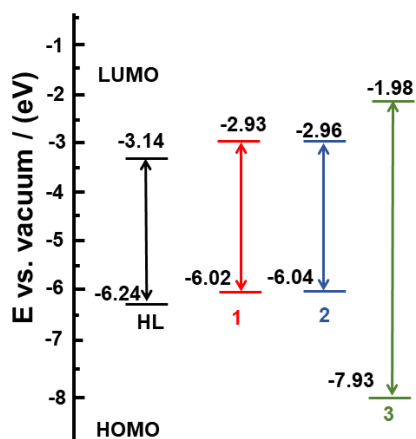

**Fig. S23** The calculated energy level diagram (LUMO and HOMO) of structures of photocatalysts including **HL**, **1**, **2** and **3** (eV vs. vacuum), where LUMO and HOMO represent the lowest unoccupied molecular orbital and highest occupied molecular orbital.

## 2.13 Photoluminescence (PL) properties

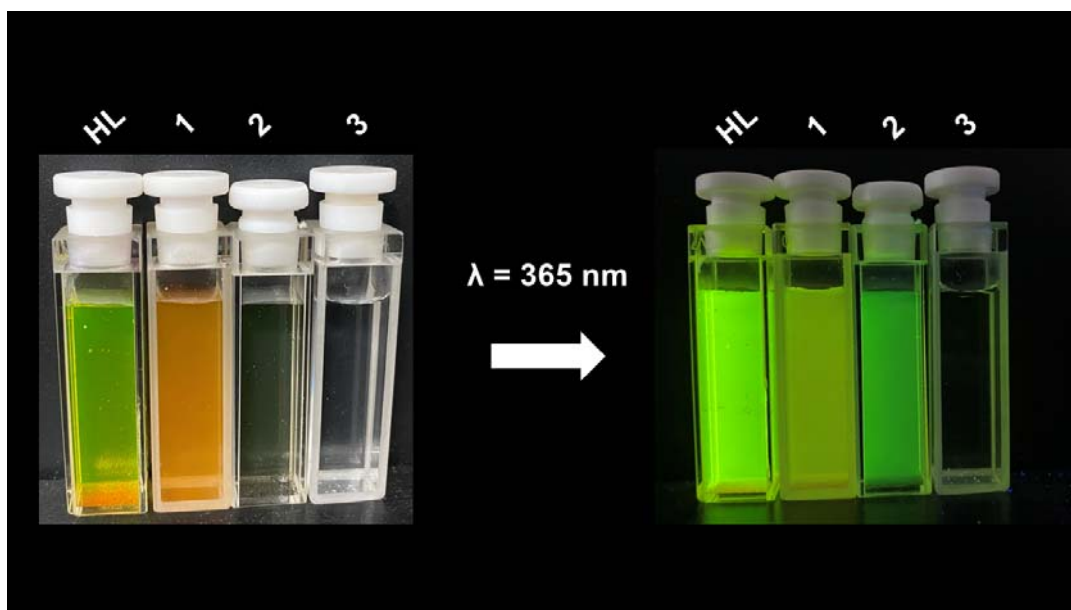

**Fig. S24** The images of **HL**, **1**, **2**, and **3** in water-suspended solutions under sunlight (left) and a hand-held UV lamp (right).

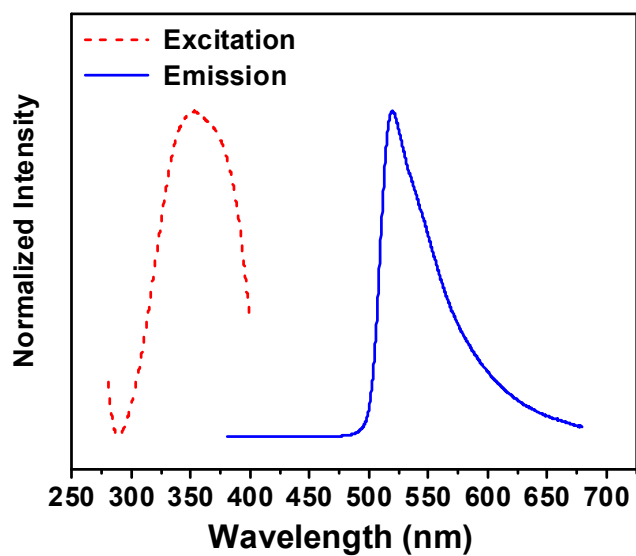

**Fig. S25** The normalized emission and excitation spectra of **HL**.

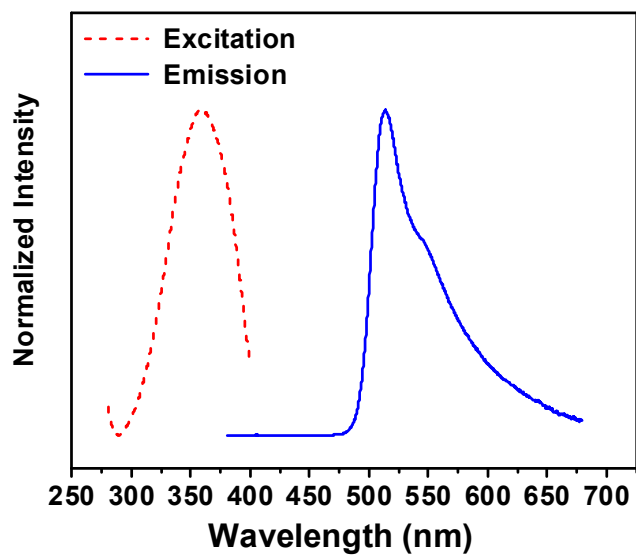

**Fig. S26** The normalized emission and excitation spectra of **1**.

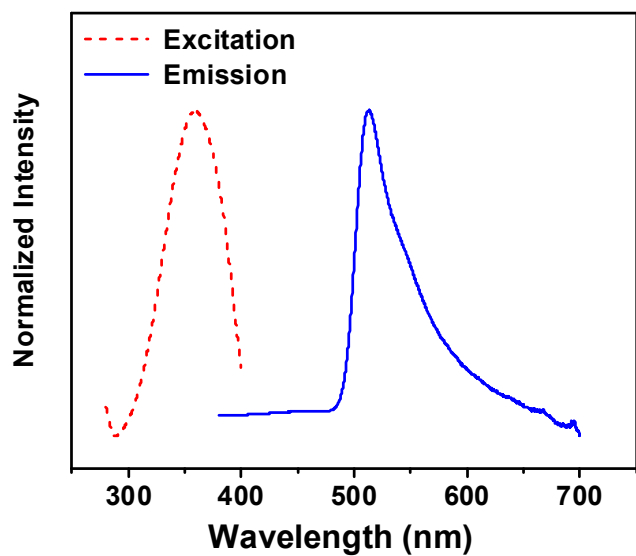

**Fig. S27** The normalized emission and excitation spectra of **2**.

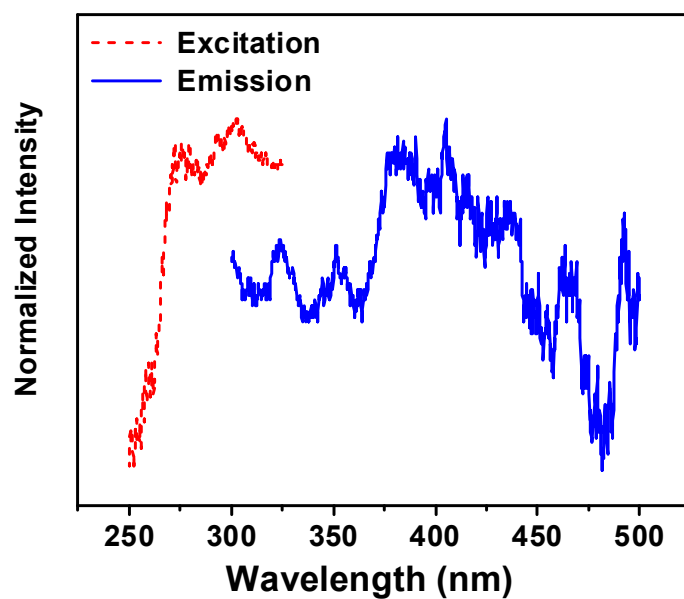

**Fig. S28** The normalized emission and excitation spectra of **3**.

#### 2.14 Room-temperature photoluminescence lifetime

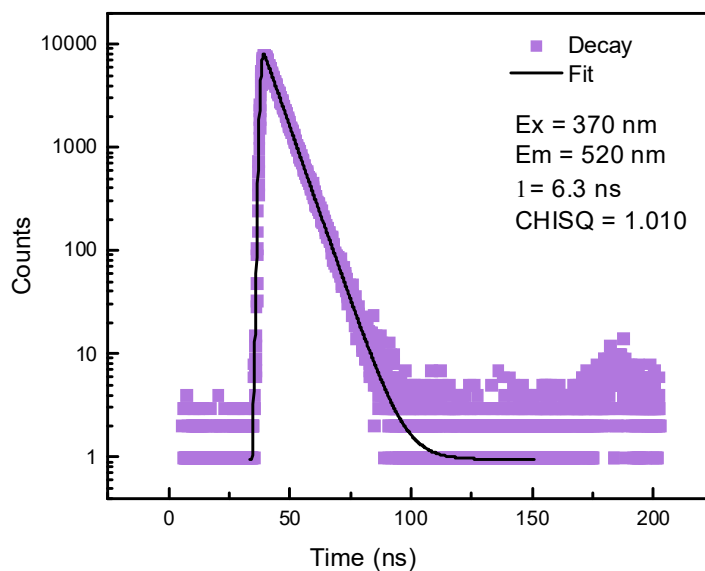

**Fig. S29** Photoluminescence decay of **HL** at film-state obtained via time-correlated single photon counting (purple), and the black line represents a dual-exponential fit of the data.

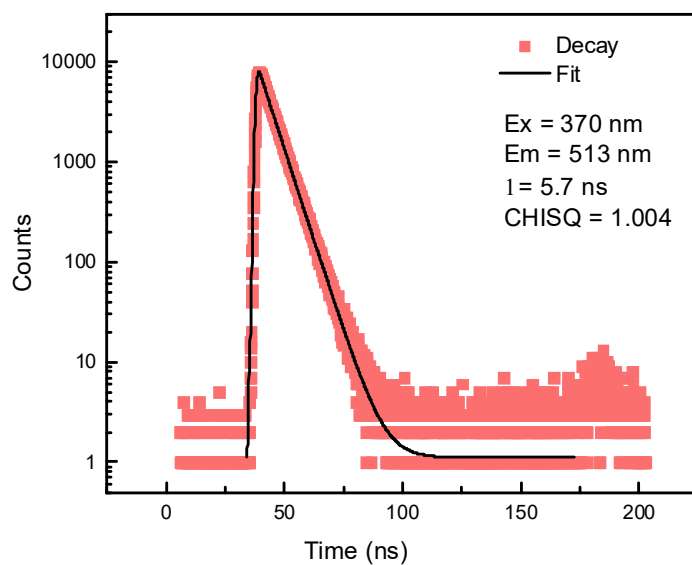

**Fig. S30** Photoluminescence decay of **1** at film-state obtained via time-correlated single photon counting (red), and the black line represents a dual-exponential fit of the data.

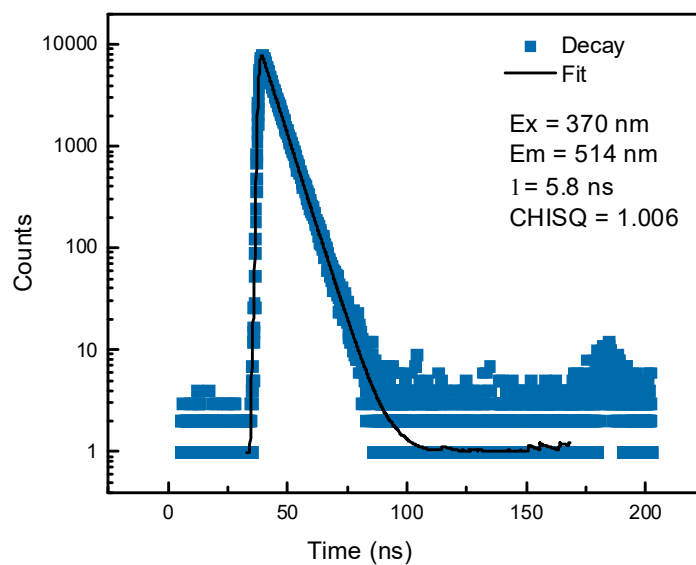

**Fig. S31** Photoluminescence decay of **2** at film-state obtained via time-correlated single photon counting (blue), and the black line represents a dual-exponential fit of the data.

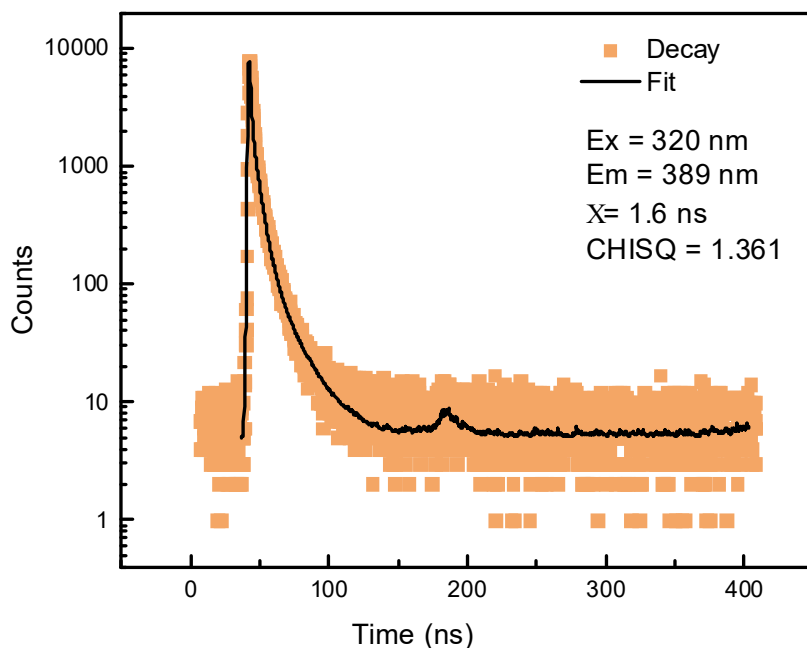

**Fig. S32** Photoluminescence decay of **3** at film-state obtained via time-correlated single photon counting (yellow), and the black line represents a triple-exponential fit of the data.

**Table S2** Summary of photophysical parameters for the compounds in the suspended state

| Complexes | $\lambda_{\text{ex}}$ | $\lambda_{\text{em}}$ | $\Phi_{\text{F}}$ (%) <sup>a</sup> | $\tau_{\text{T}}$ (ns) <sup>f</sup> |
|-----------|-----------------------|-----------------------|------------------------------------|-------------------------------------|
| <b>HL</b> | 352                   | 520                   | 80.2 <sup>b</sup>                  | 6.3 <sup>g</sup>                    |
| <b>1</b>  | 356                   | 514                   | 36.5 <sup>c</sup>                  | 5.7 <sup>g</sup>                    |
| <b>2</b>  | 358                   | 514                   | 79.2 <sup>d</sup>                  | 5.8 <sup>g</sup>                    |
| <b>3</b>  | 275                   | 389                   | 0.4 <sup>e</sup>                   | 1.6 <sup>h</sup>                    |

<sup>a</sup> Fluorescence quantum yields. <sup>b</sup>  $\lambda_{\text{ex}} = 320$  nm. <sup>c</sup>  $\lambda_{\text{ex}} = 350$  nm. <sup>d</sup>  $\lambda_{\text{ex}} = 340$  nm. <sup>e</sup>  $\lambda_{\text{ex}} = 260$  nm. <sup>f</sup> The average fluorescence decay lifetime. <sup>g</sup>  $\lambda_{\text{ex}} = 370$  nm. <sup>h</sup>  $\lambda_{\text{ex}} = 320$  nm.



## 2.15 Photo-catalytical experiment

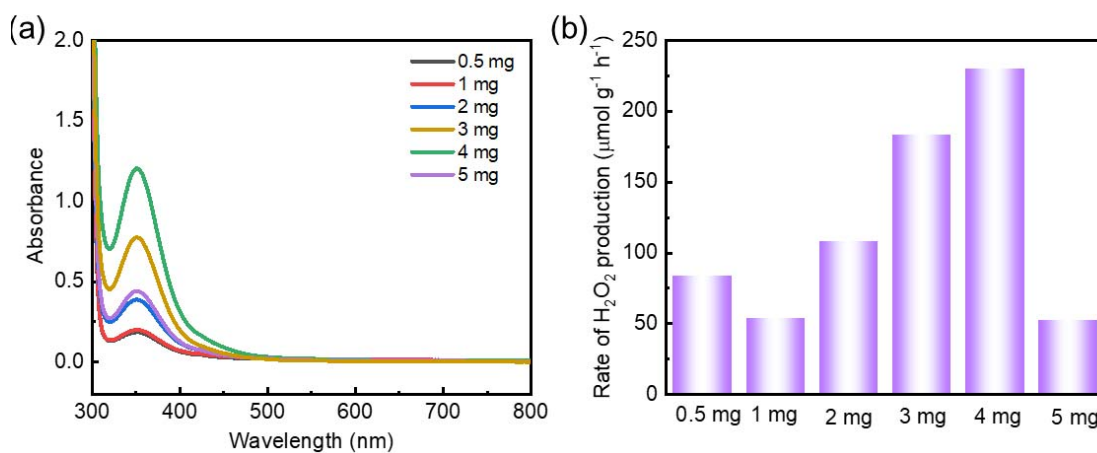

**Fig. S33** (a) UV-vis absorption spectra of  $I_3^-$  from reaction solution treated by iodometry with different amounts of photocatalyst **1**. (b) Comparison chart of  $H_2O_2$  production rate with different amounts of photocatalyst **1**. (To reach the reaction equilibrium, the reaction solution was stood at rt for 12 hours. Afterward the UV-vis absorption spectra were recorded.)

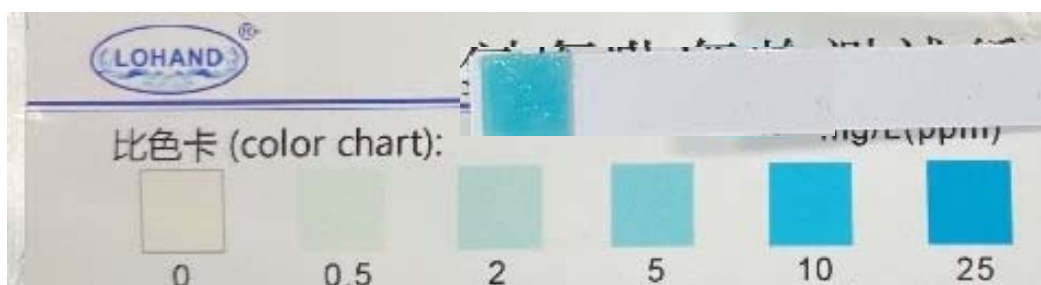

**Fig. S34** The measurement of photocatalytic  $H_2O_2$  production activities by  $H_2O_2$  test strips (picture is measurement after photocatalysis). Test conditions: photocatalysts **1**: 4 mg in 5 mL water; air condition:  $O_2$ ; light source = 300 W Xenon lamp; irradiation time = 5 hours, the scale bar is mg/L (ppm).

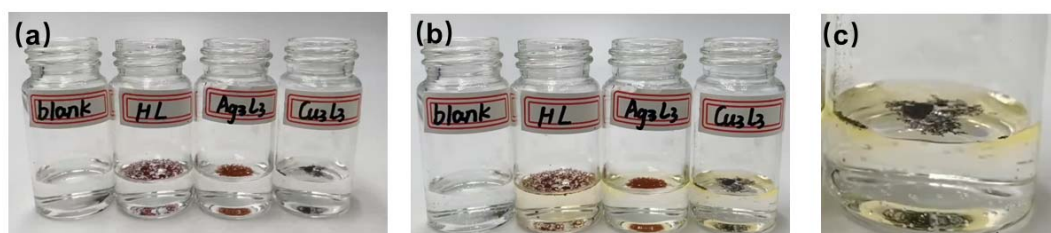

**Fig. S35** The pictures of HL, **1** ( $\text{Ag}_3\text{L}_3$ ), and **2** ( $\text{Cu}_3\text{L}_3$ ) in 3wt%  $\text{H}_2\text{O}_2$  suspension at (a) 0 min, and (b) 0.5 h, suggesting the Cu-CTC **2** can catalyze the decomposition of  $\text{H}_2\text{O}_2$ . (c) The enlarged image of **2** ( $\text{Cu}_3\text{L}_3$ ) in (b) showing the bubble and the color of solution turn to yellow.

Continuous Ar atmosphere: To rule out the possibility of  $2e^-$  WOR, the photocatalytic reactions have been conducted under continuous argon gas inflow conditions. Specifically, to 5 mL of  $\text{H}_2\text{O}$ , complex **1** (4 mg) was added, and the resulting mixture was photoirradiated for 5 h at rt. The continuous argon gas flow can remove the  $\text{O}_2$  generated from the  $4e^-$  OER, which can prohibit the ORR to produce  $\text{H}_2\text{O}_2$  under Ar atmosphere. If the  $2e^-$  WOR occurred, the  $\text{H}_2\text{O}_2$  should be detected under continuous argon gas inflow conditions. However, no  $\text{H}_2\text{O}_2$  has been detected after 5h photoirradiation, suggesting the  $2e^-$  WOR did not occur.

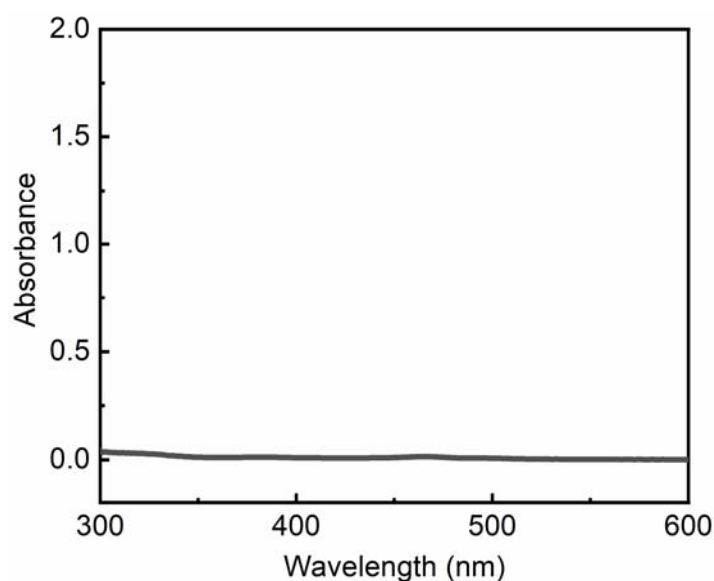

**Fig. S36** (a) UV-vis absorption spectra of  $\text{I}_3^-$  from catalytic reaction solution treated by iodometry photocatalyst **1** under continuous Ar atmosphere for 5 h (To reach the reaction equilibrium, the reaction solution was stood at rt for 12 hours. Afterward the UV-vis absorption spectra were recorded.)

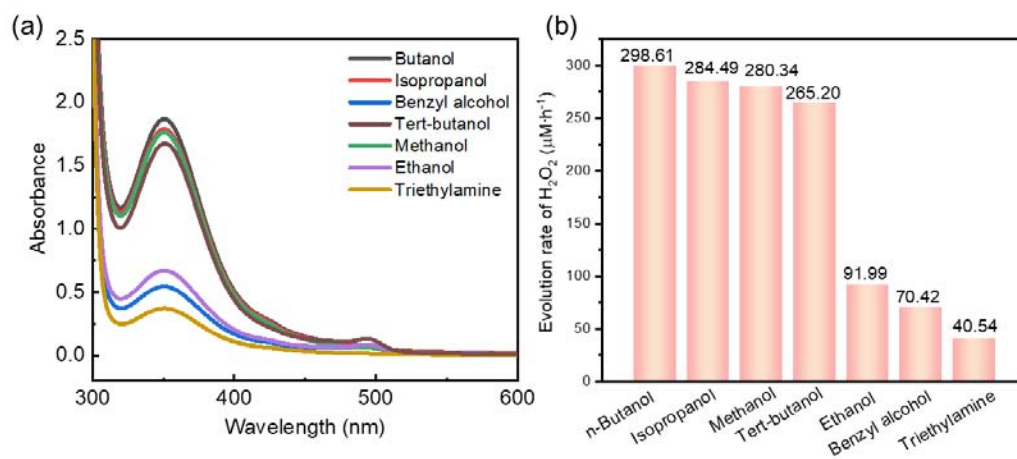

**Fig. S37** (a) UV-vis absorption spectra of  $I_3^-$  from catalytic reaction solution treated by iodometry photocatalyst **1** with different scavengers. (b) Comparison chart of  $H_2O_2$  production rate with different scavengers. (To reach the reaction equilibrium, the reaction solution was stood at rt for 12 hours. Afterward the UV-vis absorption spectra were recorded.)

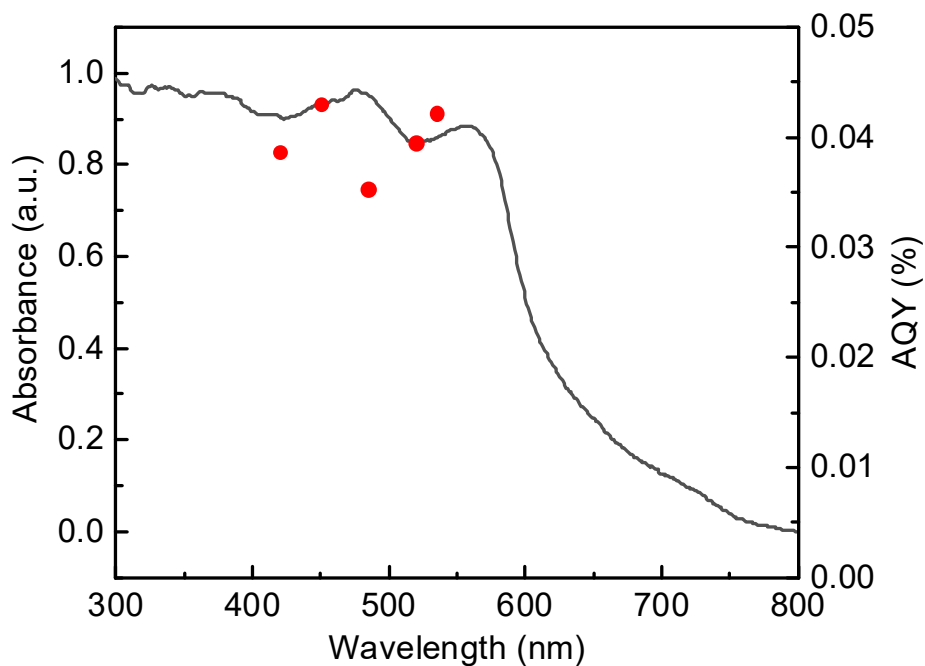

**Fig. S38** Wavelength-dependent AQY values (measured in the first 1 h) and solid-state UV-visible spectrum of **1**.

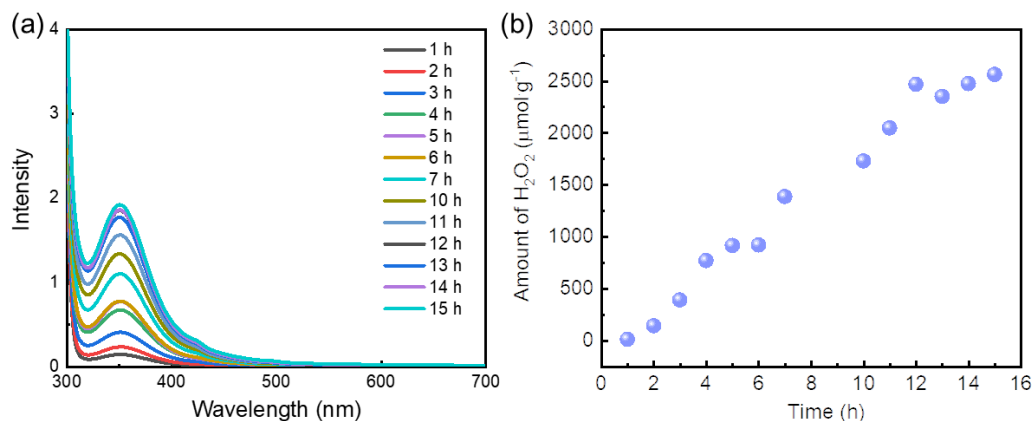

**Fig. S39** (a) UV-vis absorption spectra of  $I_3^-$  from catalytic reaction solution treated by iodometry photocatalyst **1** with different light radiation time (To reach the reaction equilibrium, the reaction solution was stood at rt for 12 hours. Afterward the UV-vis absorption spectra were recorded). (b) Long-term  $H_2O_2$  production profile. Test conditions: photocatalysts **1**: 9 mg in 15 mL water; air condition:  $O_2$ ; light source =300 W Xenon lamp.

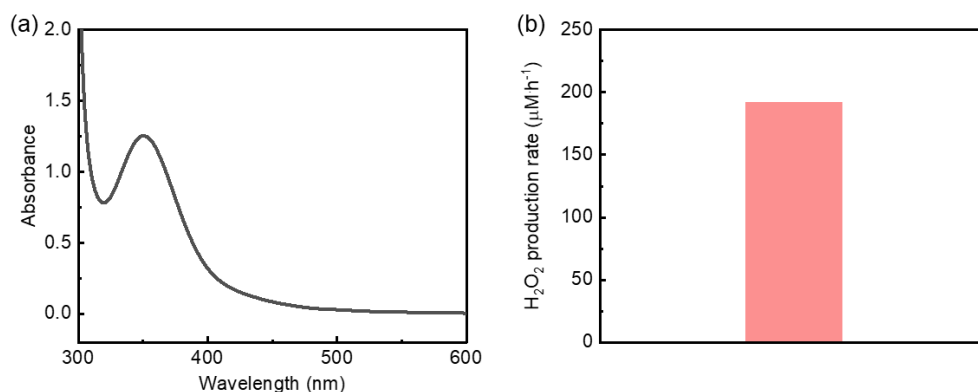

**Fig. S40** (a) UV-vis absorption spectrum of  $I_3^-$  from catalytic reaction solution treated by iodometry photocatalyst **1** using seawater (To reach the reaction equilibrium, the reaction solution was stood at rt for 12 hours. Afterward the UV-vis absorption spectra were recorded). (b) The  $H_2O_2$  production rate. Test conditions: photocatalysts **1**: 4 mg in 5 mL seawater; air condition:  $O_2$ ; light source =300 W Xenon lamp. The final result is the average of three experimental trials.

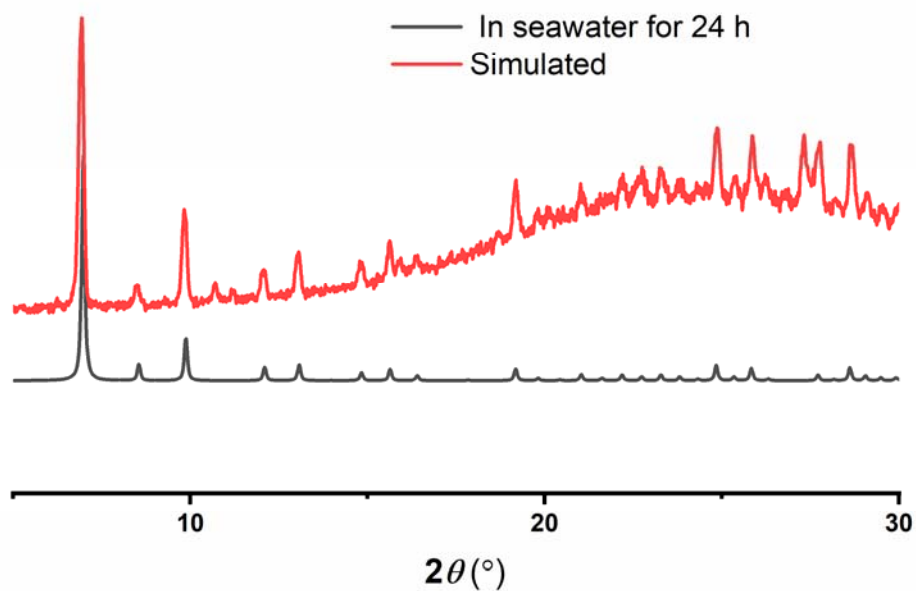

**Fig. S41** Comparison of PXRd patterns of the photocatalyst **1** before and after treatment of seawater for 24 h.

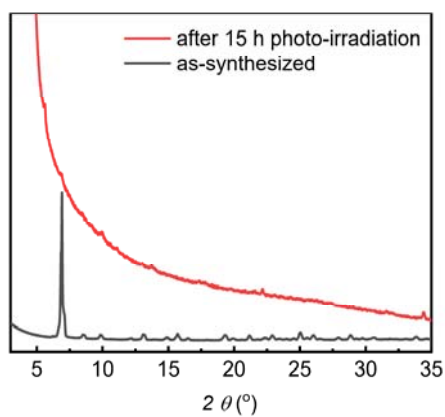

**Fig. S42** PXRd patterns of **1** before and after 15 h photo-irradiation

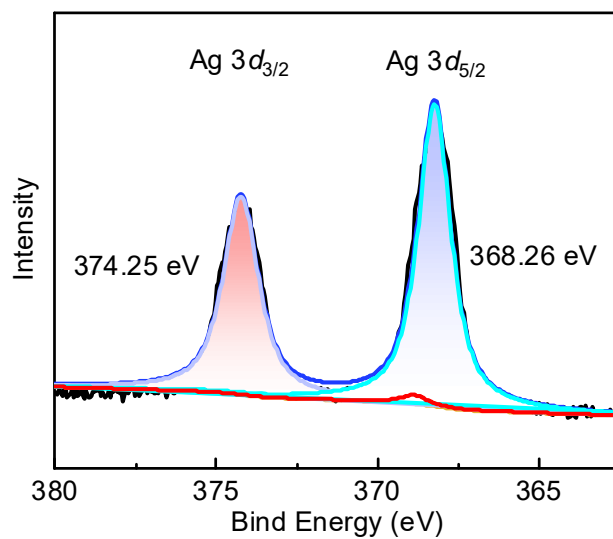

**Fig. S43** XPS for **1** after photocatalysis, suggesting the valence of Ag remain intact.

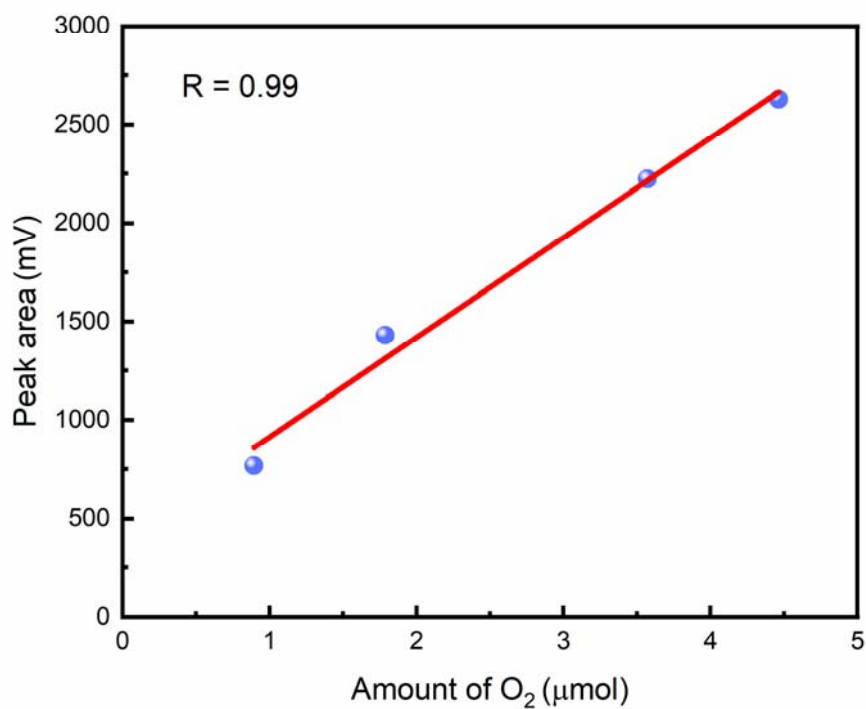

**Fig. S44** The criterion curve of O<sub>2</sub>.

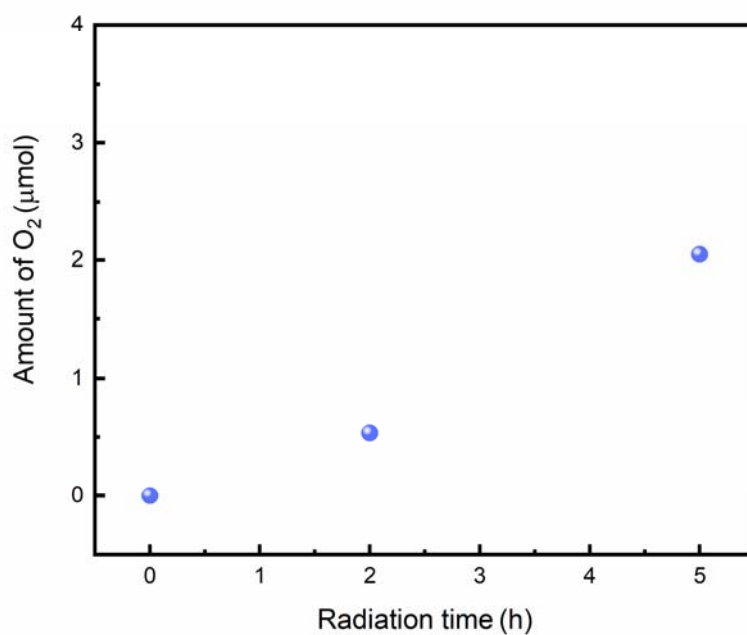

**Fig. S45** O<sub>2</sub> production in the half-reaction of photocatalyst **1**. Reaction conditions: 5 mg photocatalyst **1**, 10 mL pure water, 20 mM NaIO<sub>3</sub> and 20 mg La<sub>2</sub>O<sub>3</sub> in Ar under visible light illumination (300 W Xe lamp with a  $\lambda > 420$  nm filter).

**Table S3** Optimate experiment of oxygen evolution reaction

| Entry | Photocatalyst (mg) | La <sub>2</sub> O <sub>3</sub> (mg) | AgNO <sub>3</sub> (mg) | NaIO <sub>3</sub> (mg) | H <sub>2</sub> O (mL) | Reaction time (h) | Oxygen evolution rate (μmol /g /h) |
|-------|--------------------|-------------------------------------|------------------------|------------------------|-----------------------|-------------------|------------------------------------|
| 1     | 5                  | 20                                  | 20                     | –                      | 10                    | 5                 | 42.8                               |
| 2     | 5                  | –                                   | –                      | 20                     | 10                    | 5                 | 0.4                                |
| 3     | 5                  | 10                                  | –                      | 20                     | 10                    | 5                 | 9.6                                |
| 4     | 5                  | 20                                  | –                      | 20                     | 10                    | 5                 | 81.8                               |

## 2.17 Isotopic exchange experiments

**H<sub>2</sub><sup>18</sup>O isotopic experiment:** 1 mg of photocatalyst **1**, 0.5 mL of H<sub>2</sub><sup>18</sup>O, 1 mg NaIO<sub>3</sub> (electron scavenger), and 1 mg La<sub>2</sub>O<sub>3</sub> were added into a 10 mL vial, which was then sealed with a rubber septum and purged with Ar gas for 1 h. The vial was then irradiated with a xenon lamp equipped with a filter ( $\lambda > 420$  nm) for 12 hours, and the gas produced was detected using the Agilent 7890B GC-MS system. For the control experiment, the same procedure was followed except for the absence of irradiation and compound **1**. Indeed, the <sup>18</sup>O<sub>2</sub> can be detected, and thus indicate the complex **1** can photo-oxidize water to produce O<sub>2</sub>.

**H<sub>2</sub><sup>18</sup>O and <sup>16</sup>O<sub>2</sub> isotopic experiment:** 5 mg of photocatalyst **1** and 0.5 mL of H<sub>2</sub><sup>18</sup>O were added into a 10 mL vial, which was then sealed with a rubber septum and purged with <sup>16</sup>O<sub>2</sub> gas for 15 min. The vial was then irradiated with a xenon lamp equipped with a filter ( $\lambda > 420$  nm) for 12 hours, followed by another purge with argon gas to remove the <sup>18</sup>O<sub>2</sub> gas. The reaction solution was then transferred to another 10 mL vial containing MnO<sub>2</sub> and argon gas for 1 hour to remove <sup>16</sup>O<sub>2</sub>, and the gas produced during the decomposition of hydrogen peroxide was analyzed using the Agilent 7890B GC-MS system. For the control experiment, the same procedure was followed except for the absence of irradiation and compound **1**.



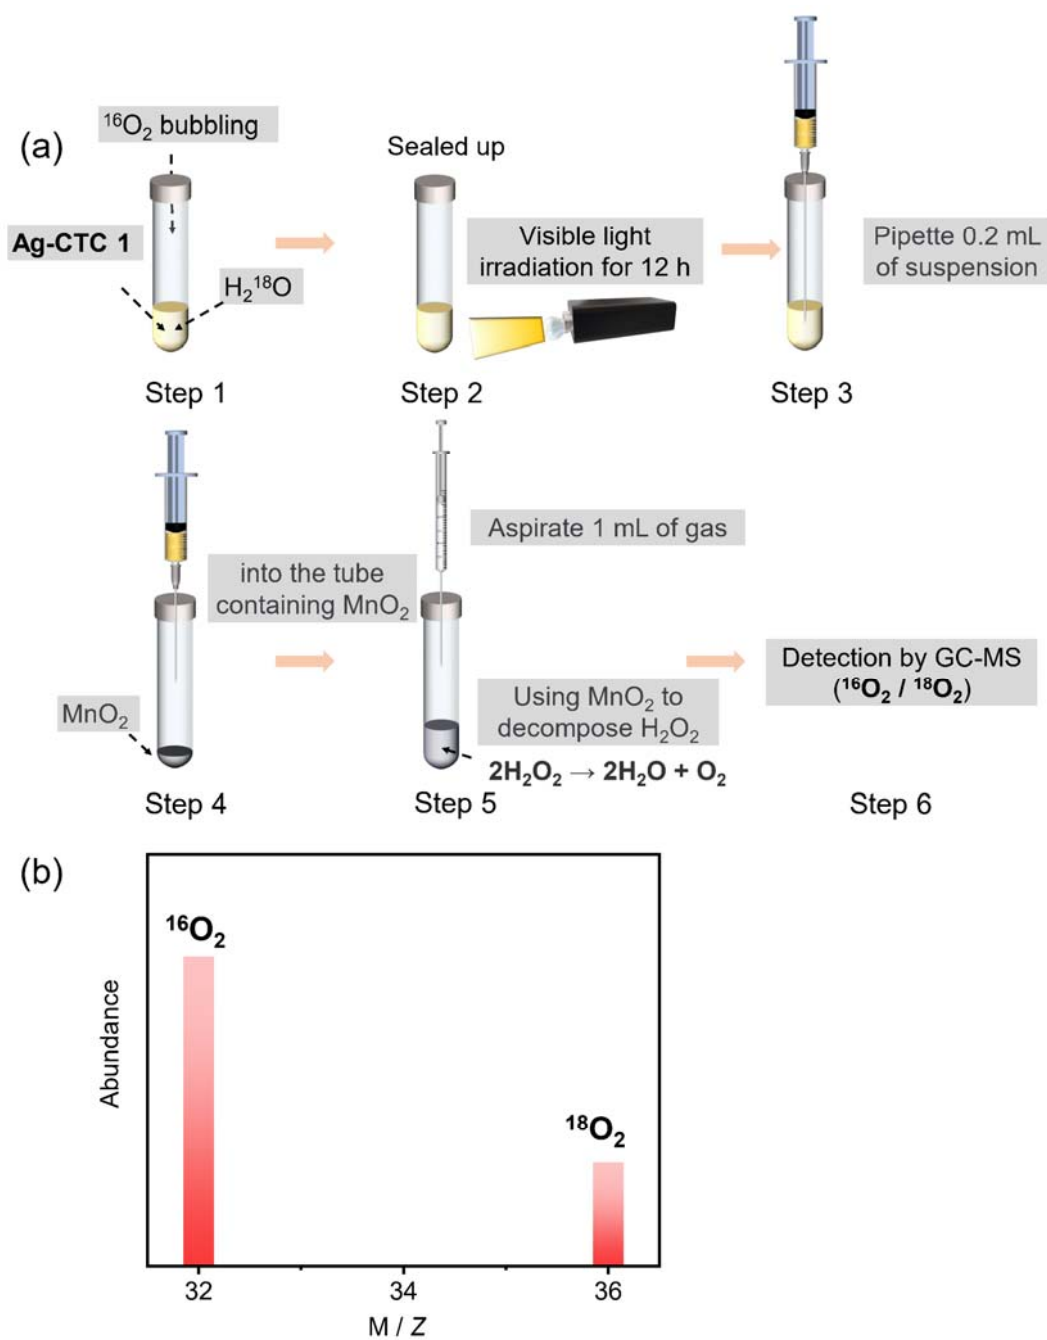

**Fig. S46** (a) Schematic diagram showing the isotope experimental procedure for H<sub>2</sub>O<sub>2</sub> production in pure water (H<sub>2</sub><sup>18</sup>O), (b) GC-MS spectra of the gas decomposition of photogenerated hydrogen peroxide by photocatalyst **1**, showing the content of <sup>18</sup>O<sub>2</sub> can be detected from H<sub>2</sub><sup>18</sup>O<sub>2</sub>.

**$^{18}\text{O}_2$  isotopic experiment:** 5 mg of photocatalyst **1** and 1.5 mL of  $\text{H}_2^{16}\text{O}$  were added into a 10 mL vial, which was then sealed with a rubber septum and purged with argon gas for 1 hour to remove  $^{16}\text{O}_2$ . Subsequently, 10 mL of  $^{18}\text{O}_2$  gas (purity: 99%) was injected into the vial using a syringe. The vial was then irradiated with a xenon lamp equipped with a filter ( $\lambda > 420$  nm) for 5 hours and 10 hours, followed by another purge with argon gas to remove the  $^{18}\text{O}_2$  gas. The reaction solution was then transferred to another 10 mL vial containing  $\text{MnO}_2$  and argon gas, and the gas produced during the decomposition of hydrogen peroxide was analyzed using the Agilent 7890B GC-MS system. For the 0-hour experiment, the same procedure was followed except for the absence of irradiation and compound **1**.

*NOTE:* Since the gas sample was injected into the GC through a syringe, the  $^{16}\text{O}_2$  come from the air.

## 2.18 RDE measurement

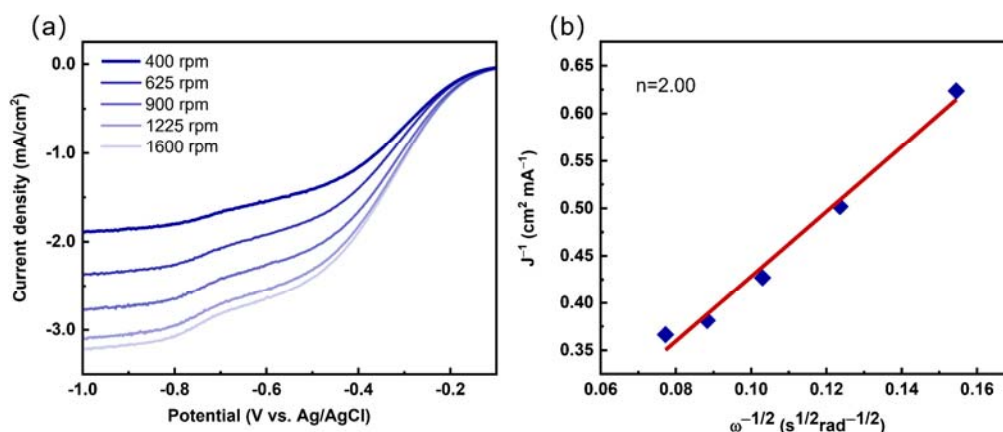

**Fig. S47** (a) Different rotating speeds of linear-sweep RDE voltammograms of the photocatalyst **1** and (b) The Koutecky–Levich plots obtained by RDE measurements at  $-0.65$  V (vs. Ag/AgCl).

## 2.19 EPR experiment

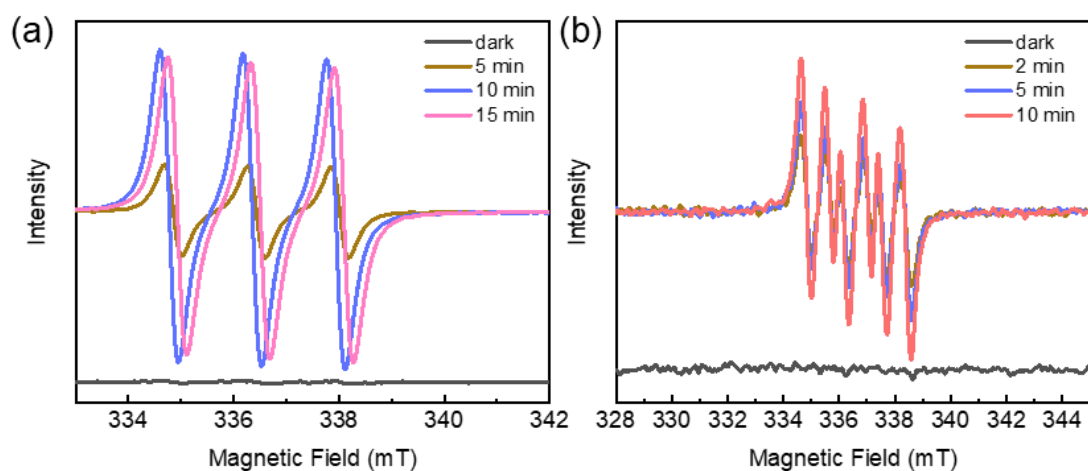

**Fig. S48** EPR signals of (a)  $^1\text{O}_2$  and (b)  $\text{O}_2^{\bullet-}$  using HL as photocatalyst under dark and visible light radiation with different time.

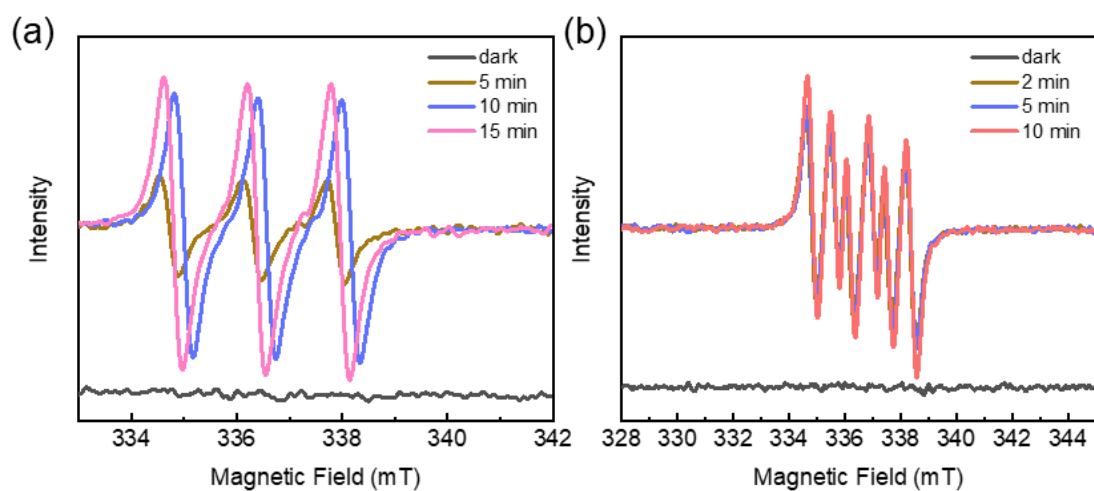

**Fig. S49** EPR signals of (a)  $^1\text{O}_2$  and (b)  $\text{O}_2^{\bullet-}$  using **1** as photocatalyst under dark and visible light radiation with different time.

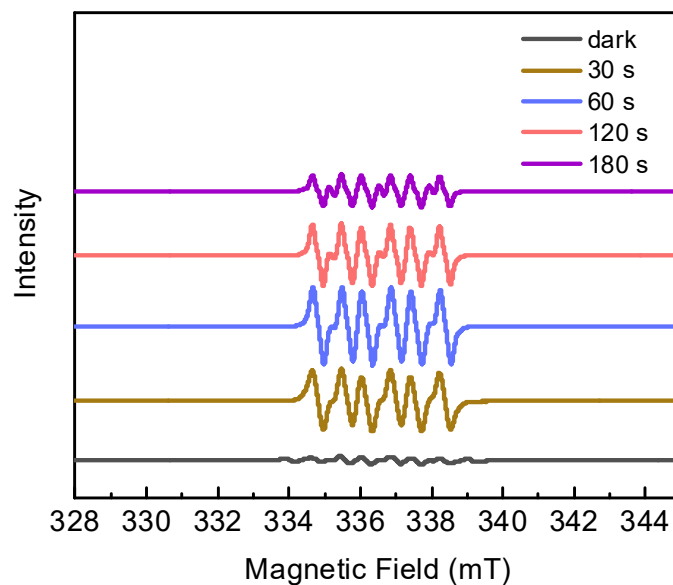

**Fig. S50** EPR signals of  $O_2^{\bullet-}$  using **2** as photocatalyst under dark and visible light radiation with different time.

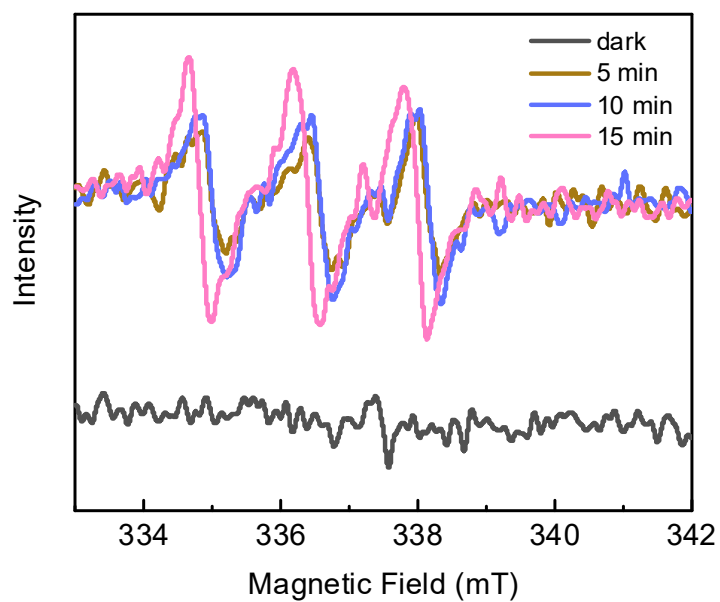

**Fig. S51** EPR signals of  $O_2$  using **3** as photocatalyst under dark and visible light radiation with different time.

## 2.20 Cyclic Voltammetry (CV) test

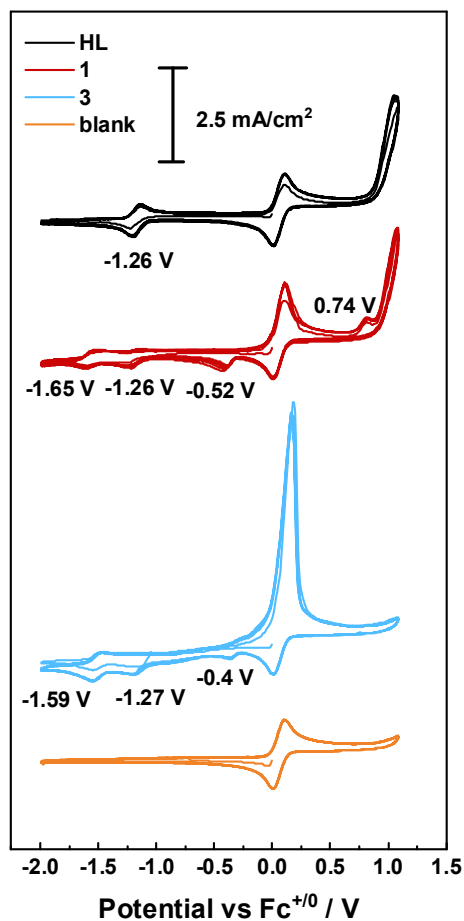

**Fig. S52** CV curves of **HL**, **1**, **3** and blank Ferrocene (Fc). The experiments were carried out in deaerated DMF solution, containing 0.5 mM of **HL**, **1**, or **3**, 0.2 mM Fc, and 0.10 M Bu<sub>4</sub>NPF<sub>6</sub> as the supporting electrolyte, with a scan rate of 0.05 V/s<sup>-1</sup> and a negative initial scan direction. Glassy carbon electrode, Ag/AgNO<sub>3</sub>, and Pt silk were used as the working electrode, reference electrode, and counter electrode, respectively.

## Section S3. Computational Details

### 3.1 DFT

Density functional theory (DFT), Time-dependent density-functional theory (TDDFT) and free energy were performed for **HL**, **1**, **2** and **3** by using Gaussian 09 software.<sup>7</sup> The following level of theory was adopted in all the calculations: (1) Functional: the hybrid Perdew, Burke, and B3LYP in conjunction with D3(BJ) dispersion correlation;<sup>8;</sup> (2) Basis sets: the LANL2DZ<sup>10-13</sup> effective core potential (ECP) was used for Cu, Ag and the 6-31G(d,p)<sup>14</sup> basis set was used for the other atoms. The geometrical optimization was performed for the monomers of all the above compounds to obtain their stable ground-state ( $S_0$ ) geometries by the B3LYP method, confirmed by the absence of imaginary frequencies. After geometrical optimization, the following computations were carried out. Electrostatic potential (ESP) surfaces were drawn for the monomer of complex **1**, by mapping ESP on the van der Waals isosurfaces of the model with isovalue = 0.03 a.u. TDDFT calculations were performed for the first 50 singlet-singlet spin-allowed transitions and the first 10 singlet-triplet spin-forbidden transitions were calculated based on the optimized  $S_0$  structures. By using Multiwfn program,<sup>15</sup> the TDDFT results were extracted from the Gaussian output files (log files), and the cub files for drawing the electron density differences (EDD) maps were obtained by the hole-electron analysis function<sup>16</sup> of Multiwfn software after inputting the log files and the formatted checkpoint (fchk) files. The isovalue of EDD maps was 0.0004 a.u.

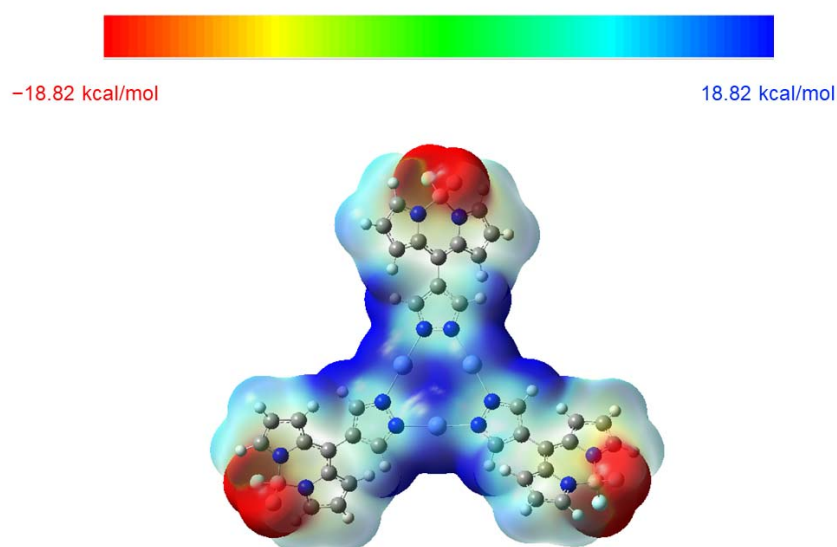

**Fig. S53** The Electrostatic Potential Surfaces (ESP) of **1** indicates the distribution of its electrons with the scale range from red to blue (units in kcal mol<sup>-1</sup>).

(a)

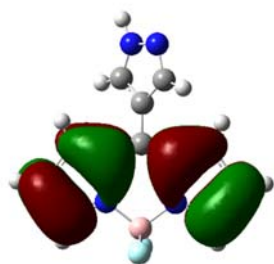

(b)

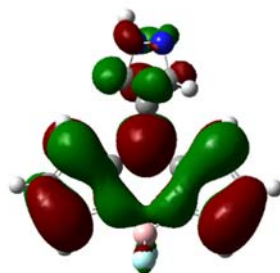

(c)

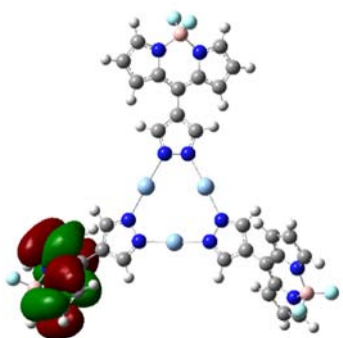

(d)

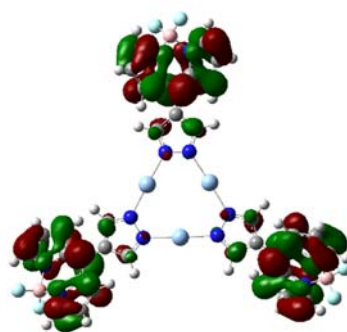

(e)

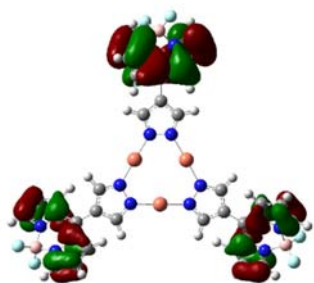

(f)

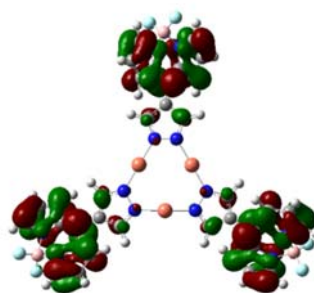

(g)

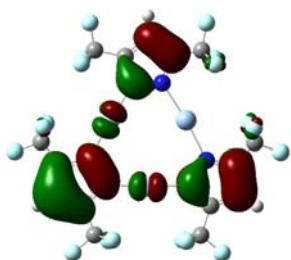

(h)

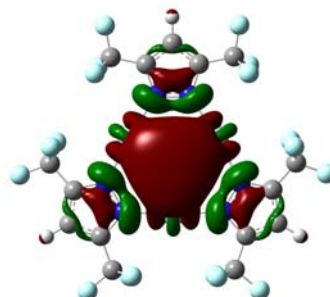

**Fig. S54** (a) HOMO and (b) LUMO of **HL**; (c) HOMO and (d) LUMO of **1**; (e) HOMO and (f) LUMO of **2**; (g) HOMO and (h) LUMO of **3**, which estimated from DFT calculations using the B3LYP/6-31G (d,p) basis set.

**Table S4** The selected singlet-singlet spin-allowed transitions of complex **1** at B3LYP-D3(BJ) / (LANL2DZ + 6-31G(d,p)) level<sup>a</sup>

| No. | E(eV)  | $\lambda(\text{nm})^b$ | $f^c$   | EDD maps <sup>d</sup>                                                               | Main transitions                                                                                                                                                                |
|-----|--------|------------------------|---------|-------------------------------------------------------------------------------------|---------------------------------------------------------------------------------------------------------------------------------------------------------------------------------|
| 1   | 2.8635 | 432.98                 | 0.00020 | 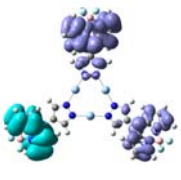   | H $\rightarrow$ L 84.5%<br>H $\rightarrow$ L+2 14.3%                                                                                                                            |
| 7   | 3.0777 | 402.85                 | 0.0570  |    | H $\rightarrow$ L+2 31.0%<br>H-2 $\rightarrow$ L 15.6%<br>H-1 $\rightarrow$ L+1 12.9%<br>H-2 $\rightarrow$ L+1 9.6%<br>H $\rightarrow$ L 6.1%                                   |
| 8   | 3.0832 | 402.13                 | 0.19500 |   | H-1 $\rightarrow$ L+1 31.7%<br>H $\rightarrow$ L+2 29.4%<br>H-1 $\rightarrow$ L 10.7%<br>H-1 $\rightarrow$ L+2 6.7%<br>H-5 $\rightarrow$ L+2 5.9%<br>H-6 $\rightarrow$ L+1 5.4% |
| 9   | 3.0938 | 400.75                 | 0.60770 |  | H-2 $\rightarrow$ L 31.9%<br>H-2 $\rightarrow$ L+1 22.0%<br>H-1 $\rightarrow$ L+1 9.3%<br>H $\rightarrow$ L+2 8.7%<br>H-7 $\rightarrow$ L 6.8%                                  |
| 11  | 3.5401 | 350.23                 | 0.08190 |  | H-5 $\rightarrow$ L+2 33.1%<br>H-6 $\rightarrow$ L+1 27.2%<br>H-6 $\rightarrow$ L 13.1%<br>H $\rightarrow$ L+2 6.2%<br>H-1 $\rightarrow$ L+1 5.6%                               |
| 12  | 3.5465 | 349.60                 | 0.33850 |  | H-7 $\rightarrow$ L 30.2%<br>H-7 $\rightarrow$ L+1 15.8%<br>H-6 $\rightarrow$ L+1 9.0%<br>H-5 $\rightarrow$ L+2 8.6%<br>H-2 $\rightarrow$ L 5.8%                                |



|    |        |        |         |                                                                                     |                                                                                                                                |
|----|--------|--------|---------|-------------------------------------------------------------------------------------|--------------------------------------------------------------------------------------------------------------------------------|
| 13 | 3.5853 | 345.81 | 0.30810 |    | H-4 → L 43.4%<br>H-8 → L+1 14.3%<br>H-3 → L+2 10.8%<br>H-3 → L+1 5.3%                                                          |
| 14 | 3.5866 | 345.69 | 0.32160 |    | H-3 → L 23.6%<br>H-3 → L+1 19.2%<br>H-8 → L+2 13.9%<br>H-3 → L+2 11.3%<br>H-4 → L+2 8.9%<br>H-4 → L+1 6.7%                     |
| 19 | 3.7146 | 333.78 | 0.30810 |    | H-10 → L 27.3%<br>H-11 → L+1 27.1%<br>H-11 → L 13.9%<br>H-4 → L 8.5%<br>H-9 → L+2 5.6%                                         |
| 20 | 3.7150 | 333.74 | 0.29810 |  | H-9 → L+2 19.5%<br>H-9 → L 17.8%<br>H-10 → L+2 15.2%<br>H-10 → L+1 10.4%<br>H-9 → L+1 10.1%<br>H-11 → L+2 9.0%<br>H-3 → L 5.4% |
| 33 | 3.9654 | 312.67 | 0.02400 |  | H-8 → L+2 77.8%<br>H-3 → L+2 5.3%                                                                                              |

<sup>a</sup> Only the TDDFT results of the  $S_1$  state and the  $S_n$  states with  $f$  larger than 0.01 among the first 10  $S_n$  states were given. <sup>b</sup> The wavelengths. <sup>c</sup> Oscillator strength. <sup>d</sup> Isovalue =  $4 \times 10^{-4}$  a.u. The electrons transfer from the blue regions to the purple regions during the excitation from the  $S_0$  state to the  $S_n$  state.

### 3.2 Adsorption Energy ( $\Delta E_{ad}$ )

For the  $H_2O_2$  production process,  $O_2$  and  $H_2O$  molecules are absorbed on the surface of photocatalysts, and adsorption free energy  $\Delta E_{ad}$  was used to estimate the strength of adsorption. The  $\Delta E_{ad}$  is defined as:

$$\Delta E_{ad} = E_{mol/sub} - E_{mol} - E_{sub} \quad (1)$$

Where  $E_{mol/sub}$  is the total energy of the adsorbed system,  $E_{mol}$  is the energy of an isolated molecule, and  $E_{sub}$  is the energy of a clean metal substrate.<sup>17</sup>

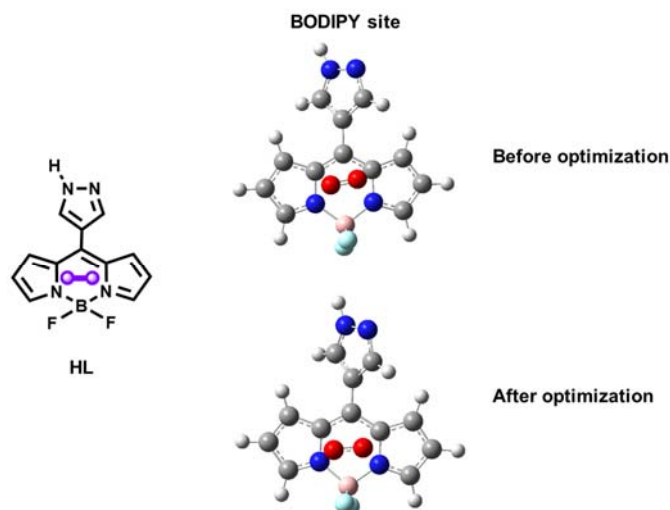

Fig. S55 The adsorption of  $O_2$  on BODIPY site of HL.

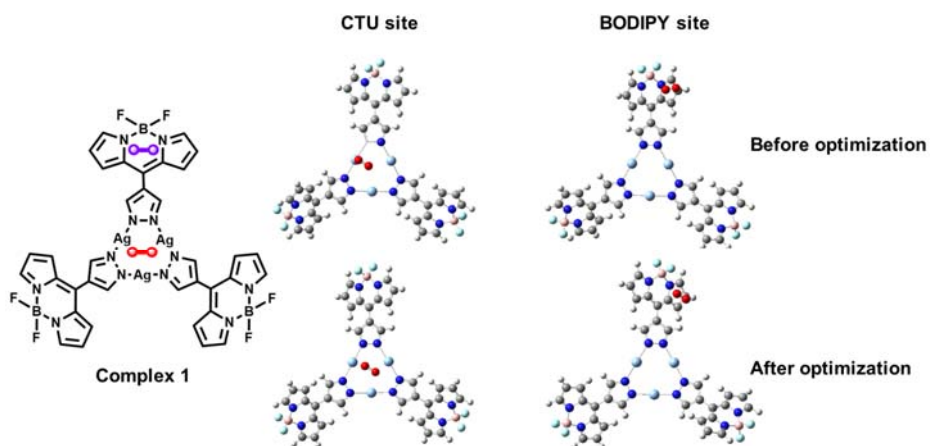

Fig. S56 The adsorption of  $O_2$  on the BODIPY site and  $Ag_3N_6$  site of 1.

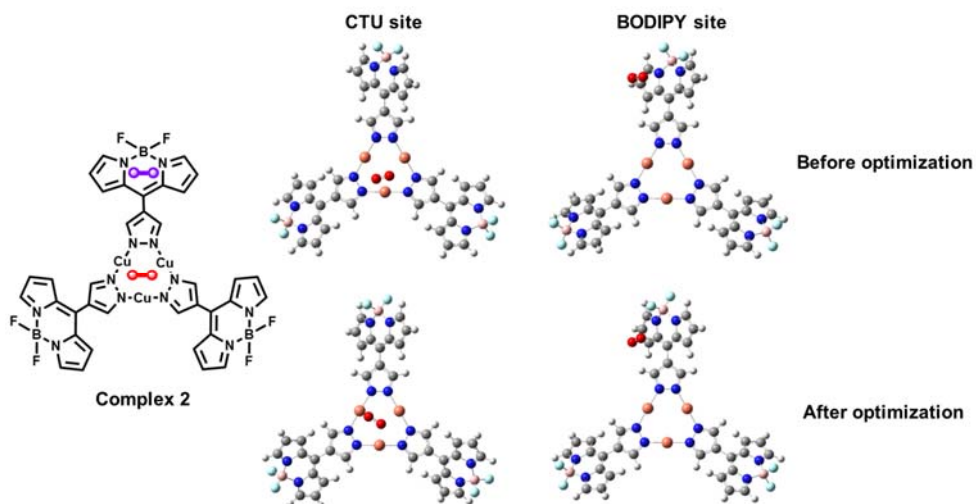

**Fig. S57** The adsorption of O<sub>2</sub> on the BODIPY site and Cu<sub>3</sub>N<sub>6</sub> site of **2**.

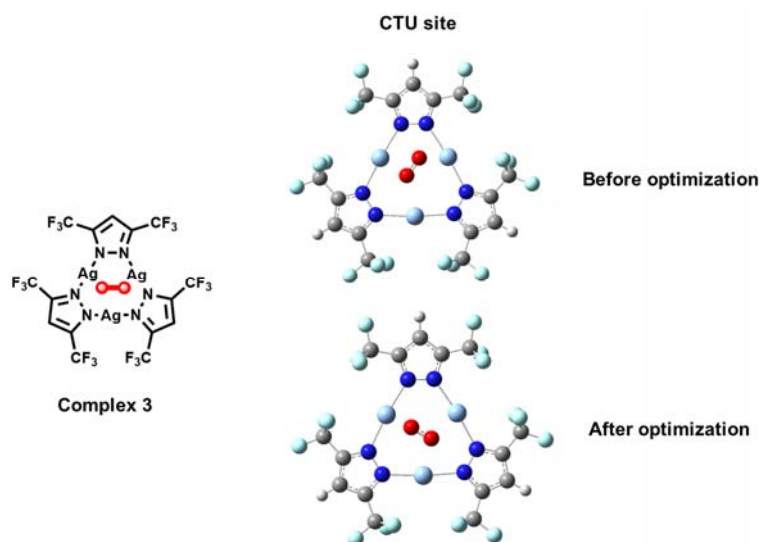

**Fig. S58** The adsorption of O<sub>2</sub> on Ag<sub>3</sub>N<sub>6</sub> site of **3**.

**Table S5** The calculated adsorption free energies (eV) of O<sub>2</sub> at different active sites of **HL**, **1**, **2** and **3**.

| Complex \ Adsorption Site                                                                     | <b>HL</b> | <b>1</b> | <b>2</b> | <b>3</b> |
|-----------------------------------------------------------------------------------------------|-----------|----------|----------|----------|
| BODIPY site                                                                                   | 0.1604    | 0.2469   | 0.2709   | —        |
| M <sub>3</sub> N <sub>6</sub> site<br>(M = Ag for <b>1</b> , and <b>3</b> ; Cu for <b>2</b> ) | —         | 0.1329   | 0.1732   | 0.1151   |

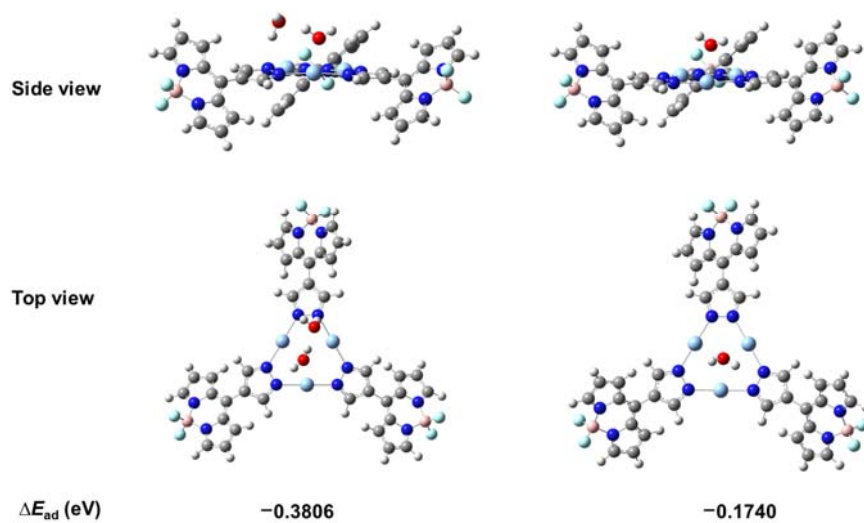

**Fig. S59** Adsorption energies of H<sub>2</sub>O on Ag<sub>3</sub>N<sub>6</sub> site of **1**. Two H<sub>2</sub>O molecules were adsorbed on Ag<sub>3</sub>N<sub>6</sub> site (left), and one H<sub>2</sub>O molecule was adsorbed on Ag<sub>3</sub>N<sub>6</sub> site (left).

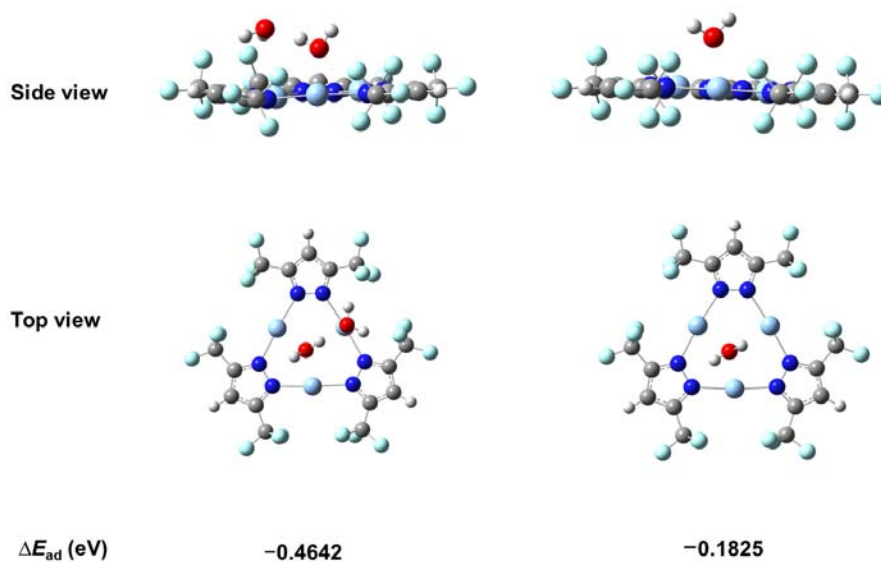

**Fig. S60** Adsorption energies of H<sub>2</sub>O on Ag<sub>3</sub>N<sub>6</sub> site of **3**. Two H<sub>2</sub>O molecules were adsorbed on Ag<sub>3</sub>N<sub>6</sub> site (left), and one H<sub>2</sub>O molecule was adsorbed on Ag<sub>3</sub>N<sub>6</sub> site (left).

### 3.3 Reaction Gibbs Free Energy ( $\Delta G$ )

The reaction Gibbs free energy was calculated the following equation<sup>18</sup>:

$$\Delta G = G(\text{products}) - G(\text{reactants}) \quad (2)$$

The Gaussian software works by calculating the corrections to the enthalpy and entropy of formation or reaction based on total energy and contributions from vibrational, rotation, translational, or electronic motion. Thus, the reaction Gibbs free energy based on Gaussian was calculated in the following equation<sup>19</sup>:

$$\Delta_r G = \sum(\epsilon_0 + G_{\text{Corr}})\text{products} - \sum(\epsilon_0 + G_{\text{Corr}})\text{reactants} \quad (3)$$

The values of  $\epsilon_0$ ,  $G_{\text{Corr}}$  are calculated from the thermochemistry of  $\text{H}_2\text{O}_2$  at the DFT level using B3LYP with a 6-31G(d,p) basis set, where  $\epsilon_0$  is the electronic energy,  $G_{\text{Corr}}$  is the Gibbs free energy correction. The sum of the electronic and Gibbs free energy and the sum of the electronic is used as  $\epsilon_0 + G_{\text{Corr}}$ .

The free energy of ( $\text{H}^+ + \text{e}^-$ ) is considered by employing the computational hydrogen electrode model as proposed by Nørskov et al.<sup>20</sup> " $\text{H}^+ + \text{e}^-$ " was assumed to be in equilibrium with  $1/2 \text{H}_2$ , at  $\text{pH} = 0$  and  $0 \text{ V}$  potential in SHE.<sup>21</sup>

For the  $\text{O}_2$  production process,  $\text{H}_2\text{O}$  molecules are absorbed on the surface of photocatalysts, and adsorption free energy  $\Delta E_{ad}$  was used to estimate the strength of adsorption. the OER process involves a four-electron reaction that sequentially forms  $\text{*OH}$ ,  $\text{*O}$ , and  $\text{*OOH}$  or  $\text{*O*OH}$  intermediates. since the adsorption energy of the intermediate  $\text{*OOH}$  is lower than that of the intermediate  $\text{*O*OH}$ , here the preferable OER process is a single-site process which is summarized as below:

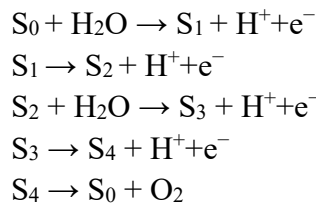

where the asterisk (\*) refers to the catalyst and active adsorption site on the catalyst. Where  $\text{S}_0$  denotes the bare surface,  $\text{S}_1$ ,  $\text{S}_2$ ,  $\text{S}_3$ , and  $\text{S}_4$  denote the intermediates of  $\text{*OH}$ ,  $\text{*O}$ ,  $\text{*OOH}$ , and  $\text{*O}_2$  on reaction site. If the  $\Delta G$  value of all the four elementary steps is different, the overpotential ( $\eta$ ) used to further rationalize the catalytic performance of OER and would be calculated by using the following equations:

$$\eta^{\text{OER}} = \max \{ \Delta G_a, \Delta G_b, \Delta G_c, \Delta G_d \} / e - 1.23 \quad (4)$$

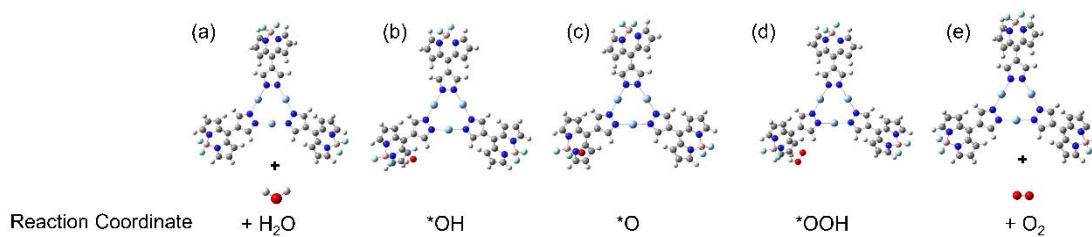

**Fig. S61** The optimized geometries of reaction intermediates at the Ag<sub>3</sub>N<sub>6</sub> site of **1**.

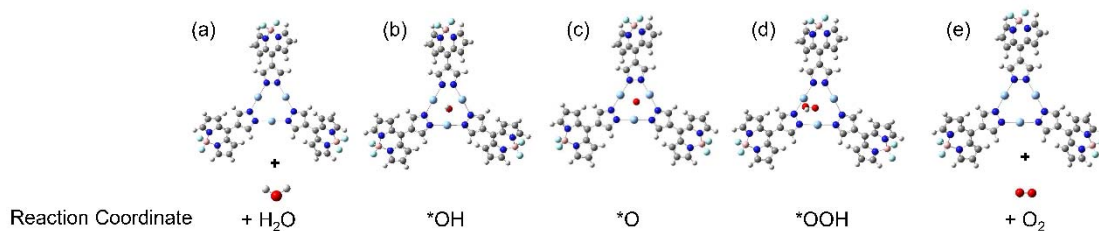

**Fig. S62** The optimized geometries of reaction intermediates at the BODIPY site of **1**.

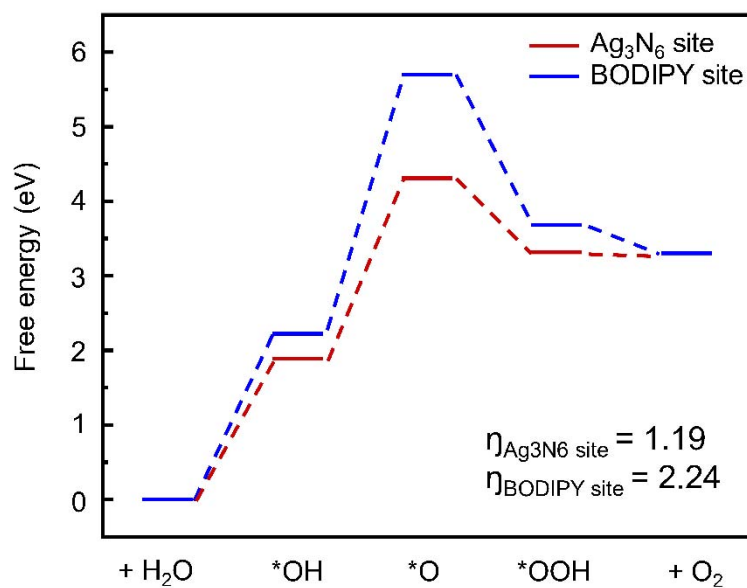

**Fig. S63** Calculated free energy diagrams and overpotentials of four-electron water oxidation pathway on different active sites (bule line: BODIPY site, red line: Ag<sub>3</sub>N<sub>6</sub> site)

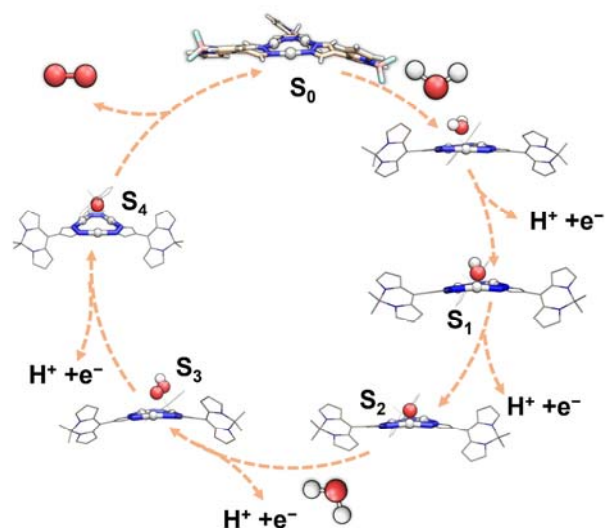

**Fig. S64** The photocatalytic water oxidation reaction into O<sub>2</sub> production via a single-site process of **1**. S<sub>0</sub> is the bare surface and S<sub>1</sub>-S<sub>4</sub> are the structures of intermediate states (\*OH, \*O, \*OOH, \*O<sub>2</sub>) involved in the four-electron water oxidation process. The calculations are based on the Ag<sub>3</sub>N<sub>6</sub> site.

**Table S6** Photocatalytic H<sub>2</sub>O<sub>2</sub> production performance of various reported noncovalent organic molecular assemblies. Note that the H<sub>2</sub>O<sub>2</sub> production rate can depend strongly on the irradiation source and the precise experimental set-up, and hence these values can only be compared in a qualitative sense.

| Materials                                                                                                                                    | The H <sub>2</sub> O <sub>2</sub> production rate (μM h <sup>-1</sup> ) | Reference                                                      |
|----------------------------------------------------------------------------------------------------------------------------------------------|-------------------------------------------------------------------------|----------------------------------------------------------------|
| Ag-CTC <b>1</b>                                                                                                                              | 183.7 and 192.3 (λ > 420 nm)<br>298.6 (λ > 420 nm) with SA              | This work                                                      |
| [Ru <sup>II</sup> (Me <sub>2</sub> phen) <sub>3</sub> ]SO <sub>4</sub>                                                                       | 30 (λ > 420 nm) with WOC and Sc <sup>3+</sup>                           | <i>J. Mater. Chem. A</i> , 2015, <b>3</b> , 12404–12412        |
| Ni <sup>II</sup> [Ru <sup>II</sup> (CN) <sub>4</sub> (bpy)]                                                                                  | 34 (λ > 390 nm) with Sc <sup>3+</sup> and SA                            | <i>Chem. Commun.</i> , 2017, <b>53</b> , 3473–3476             |
| [Fe(H <sub>2</sub> O) <sub>3</sub> ] <sub>2</sub> [Ru(CN) <sub>6</sub> ]@sAlMCM-41                                                           | 44 with Sc <sup>3+</sup>                                                | <i>Inorg. Chem.</i> , 2016, <b>55</b> , 5780–5786              |
| ZnPPc-NBCN-1.5                                                                                                                               | 57                                                                      | <i>PNAS</i> , 2021, <b>118</b> , e2103964118                   |
| [Ru <sup>II</sup> (Me <sub>2</sub> phen) <sub>3</sub> ]SO <sub>4</sub>                                                                       | 58 with WOC and Sc <sup>3+</sup>                                        | <i>Catal. Sci. Technol.</i> , <b>2016</b> , <b>6</b> , 681–684 |
| [Ru <sup>II</sup> (Me <sub>2</sub> phen) <sub>3</sub> ]SO <sub>4</sub>                                                                       | 68 (λ > 420 nm) with WOC, P and Sc <sup>3+</sup>                        | <i>Energy Environ. Sci.</i> , 2013, <b>6</b> , 3756–3764       |
| [Ir <sup>III</sup> (Cp*)(4-(1H-pyrazol-1-yl-κN <sub>2</sub> )benzoic acid-κC <sub>3</sub> )-(H <sub>2</sub> O)] <sub>2</sub> SO <sub>4</sub> | 81 with NADH                                                            | <i>Inorg. Chem.</i> , 2016, <b>55</b> , 7747–7754              |
| [Ru <sup>II</sup> ((MeO) <sub>2</sub> bpy) <sub>3</sub> ]SO <sub>4</sub>                                                                     | 114 with BiVO <sub>4</sub> and Sc <sup>3+</sup>                         | <i>RSC Adv.</i> , 2016, <b>6</b> , 42041–42044                 |
| (Cu(acac) <sub>2</sub> /ms-BiVO <sub>4</sub> )                                                                                               | 68<br>283 with SA                                                       | <i>J. Phys. Chem. C</i> , 2020, <b>124</b> , 3715–3721         |

SA: sacrificial reagent, WOC: water oxidation catalyst, P: proton source (e.g., H<sub>2</sub>SO<sub>4</sub>), NADH: 1,4-dihydronicotinamide adenine dinucleotide



## Reference

- 1 Wei, Z.; Liu, M.; Zhang, Z.; Yao, W.; Tan, H.; Zhu, Y., *Energy Environ.Sci.*, 2018, **11**, 2581–2589.
- 2 Lingampalli, S.; Gautam, U. K.; Rao, C., *Energy Environ. Sci.*, **2013**, *6*, 3589–3594.
- 3 Xia, R.-Q.; Zheng, J.; Wei, R.-J.; He, J.; Ye, D.-Q.; Ning, G.-H.; Li, D., *Inorg. Chem. Front.*, 2022, **9**, 2928–2937.
- 4 Sheldrick, G., *Acta Cryst. A*, 2008, **64**, 112–122.
- 5 Dolomanov, O. V.; Bourhis, L. J.; Gildea, R. J.; Howard, J. A. K.; Puschmann, H., *OLEX2: J. Appl. Cryst.*, 2009, **42**, 339–341.
- 6 Li, X.; Kang, B.; Dong, F.; Zhang, Z.; Luo, X.; Han, L.; Huang, J.; Feng, Z.; Chen, Z.; Xu, J.; Peng, B.; Wang, Z. L., *Nano Energy*, 2021, **81**, 105671.
- 7 Frisch, M.; Trucks, G.; Schlegel, H.; Scuseria, G.; Robb, M.; Cheeseman, J.; Scalmani, G.; Barone, V.; Mennucci, B.; Petersson, G. Fox. Gaussian 09 (Revision E. 01). Gaussian. Inc., *Wallingford, CT*, 2009.
- 8 S. Grimme, J. Antony, S. Ehrlich and H. Krieg, *J. Chem. Phys.*, 2010, **132**, 154104.
- 9 S. Grimme, S. Ehrlich and L. Goerigk, *J. Comput. Chem.*, 2011, **32**, 1456–1465.
- 10 T. H. Dunning, Jr., and P. J. Hay, In *Modern Theoretical Chemistry*; Schaefer, H. F., III., *Ed. Plenum: New York*, 1976, **3**, 1–28.
- 11 P. J. Hay and W. R. Wadt., *J. Chem. Phys.*, 1985, **82**, 270.
- 12 W. R. Wadt and P. J. Hay, *J. Chem. Phys.*, 1985, **82**, 284.
- 13 P. J. Hay and W. R. Wadt, *J. Chem. Phys.*, 1985, **82**, 299.
- 14 P. C. Hariharan, and J. A. Pople, *Mol. Phys.*, 1974, **27**, 209.
- 15 T. Lu and F. Chen, *J. Comput. Chem.*, 2012, **33**, 580–592.
- 16 Z. Liu, T. Lu, Q. Chen, *Carbon*, 2020, **165**, 461–467.
- 17 Karlberg, G. S.; Jaramillo, T. F.; Skúlason, E.; Rossmeisl, J.; Bligaard, T.; Nørskov, J. K., *Phys. Rev. Lett.*, 2007, **99**, 126101.
- 18 Ochterski J W. *Gaussian Inc*, 2000, **1**, 1–20.
- 19 Pintea M, Mason N, Peiró-Franch A, et al. *Front. Chem.*, 2023, **11**, 1028008.
- 20 Nørskov, J. K.; Rossmeisl, J.; Logadottir, A.; Lindqvist, L.; Kitchin, J. R.; Bligaard, T.; Jonsson, H., *J. Phys. Chem. B*, 2004, **108**, 17886–17892.
- 21 Han, G.; Zhang, X.; Liu, W.; Zhang, Q.; Wang, Z.; Cheng, J.; Yao, T.; Gu, L.; Du, C.; Gao, Y.; Yin, G., *Nat. Commun.*, 2021, **12**, 6335.
